# Supplementary material for: A Tumor Microenvironment-Driven Network Regulated by STAT3 and p65 Negatively Controls the Enrichment of Cancer Stem Cells in Human HR+/HER2− Breast Cancer
Source: MDPI journal article supplement (doi:10.3390/cancers15082255), 2023-04-12

WB raw data  
corresponding to Figure 4

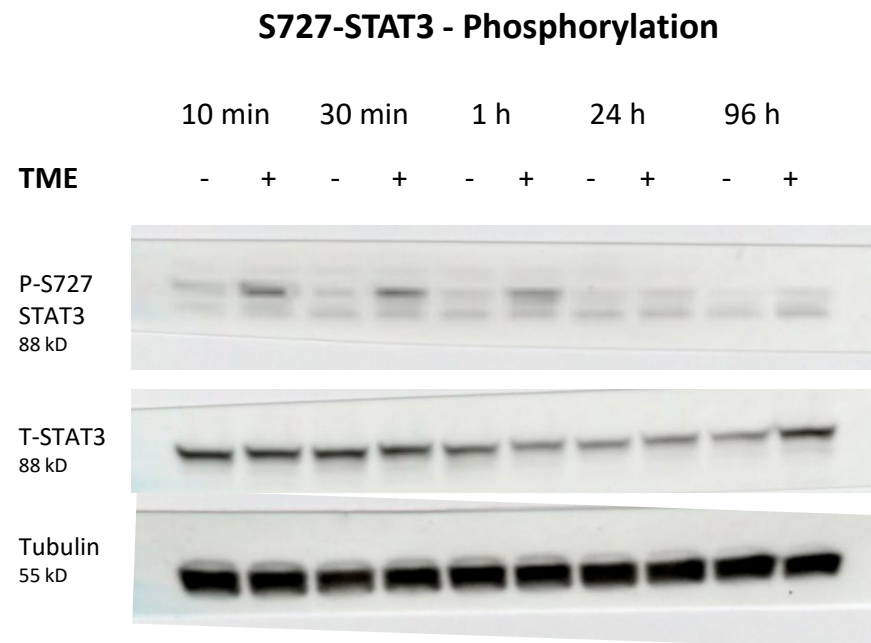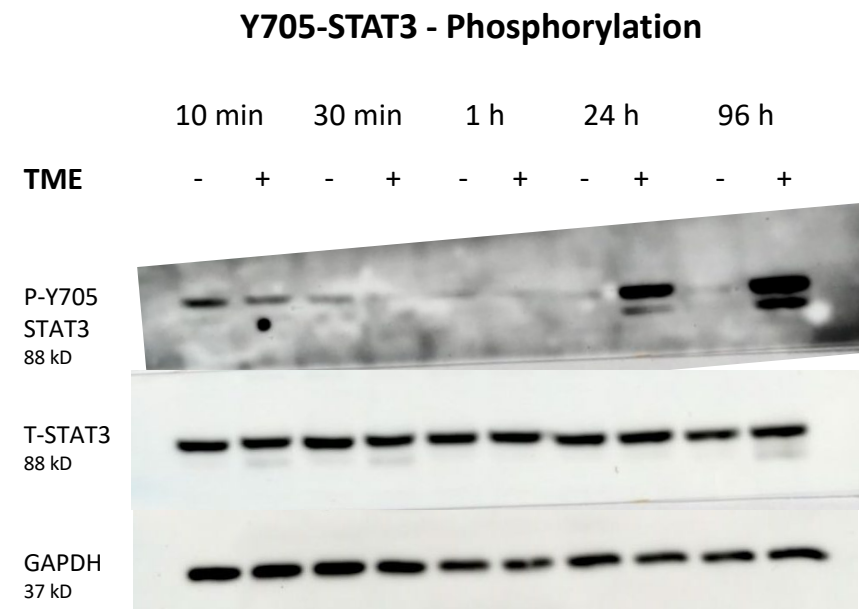

WB raw data  
corresponding to Figure 5

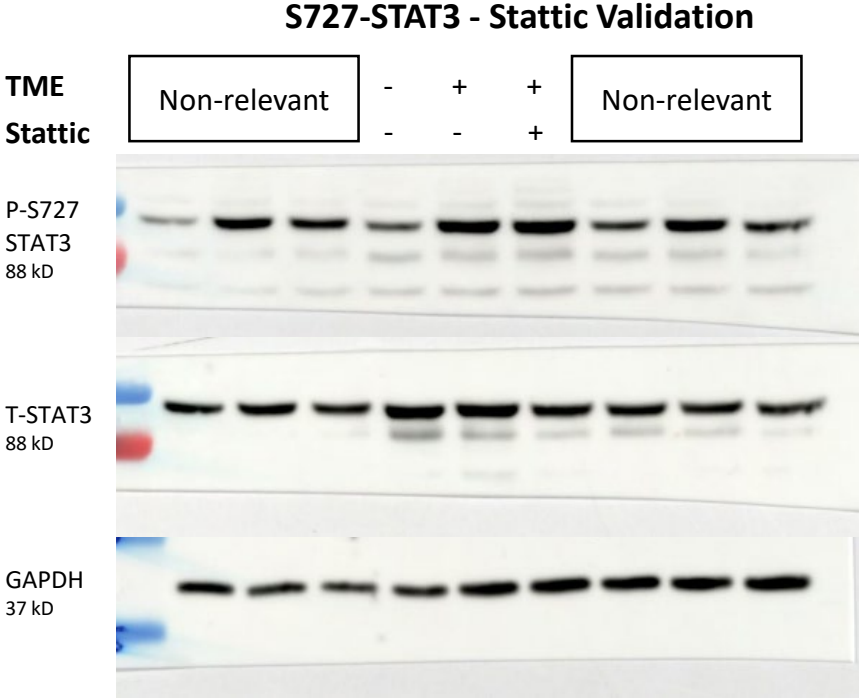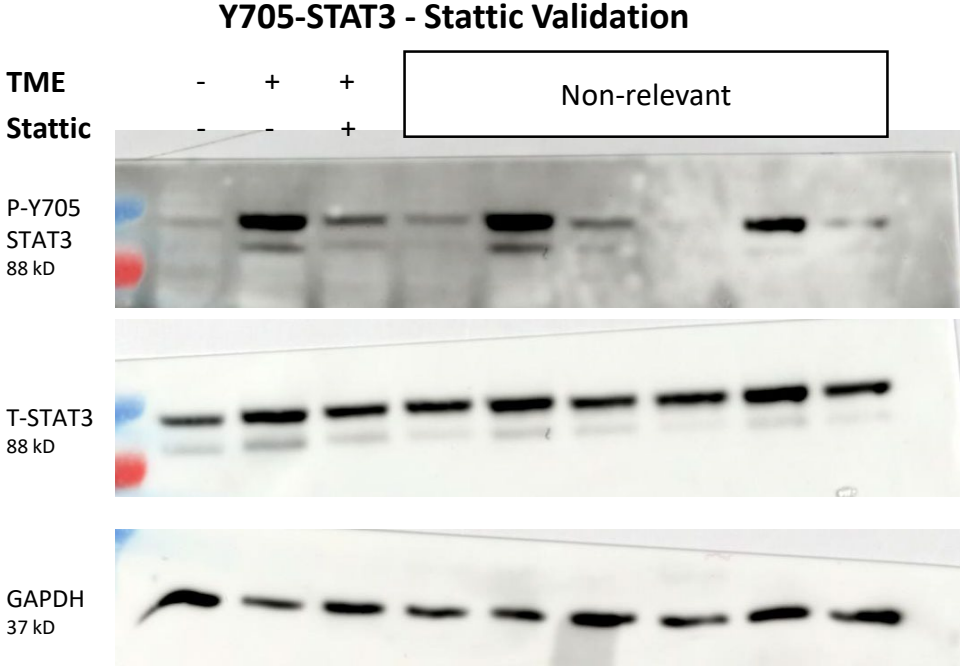

WB raw data  
corresponding to Figure 6

Y705-STAT3 - siSTAT3 Validation

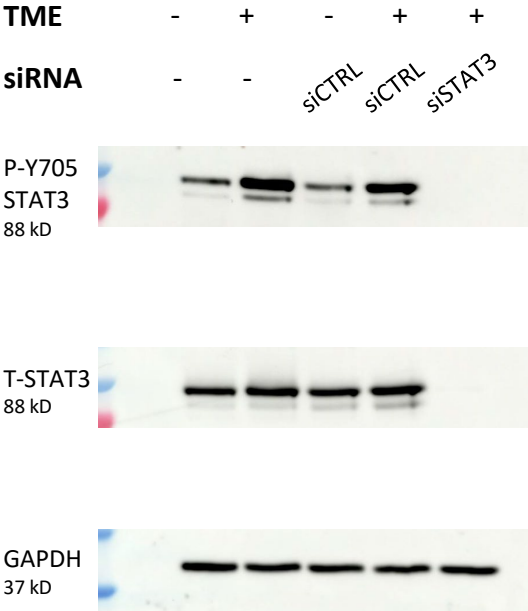

S727-STAT3 - siSTAT3 Validation

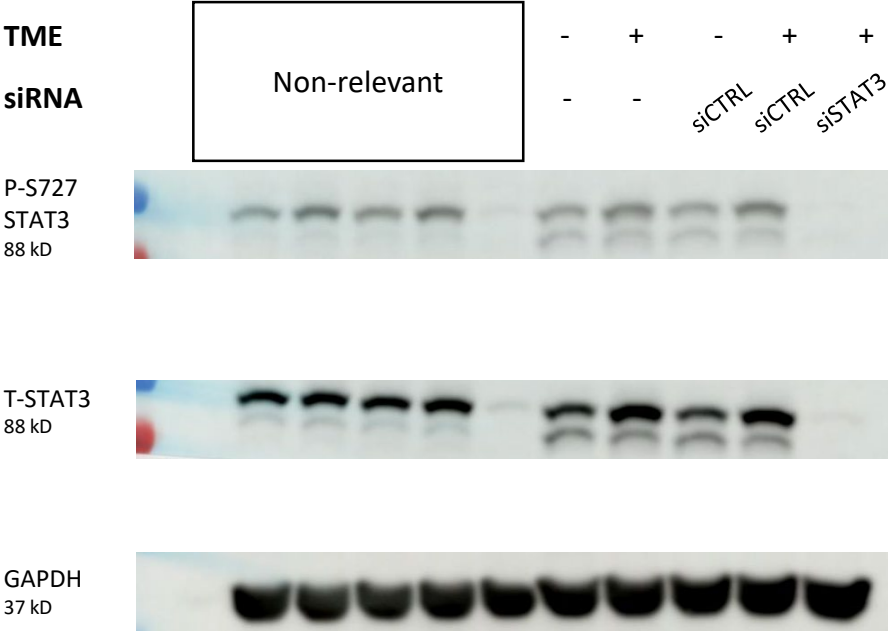

WB raw data  
corresponding to Figure 7

**STAT1 - Phosphorylation**

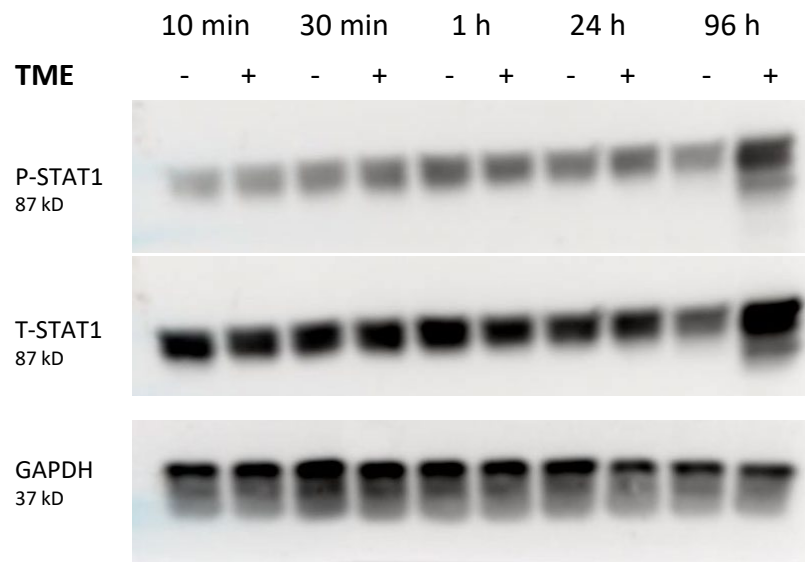

**p65 - Phosphorylation**

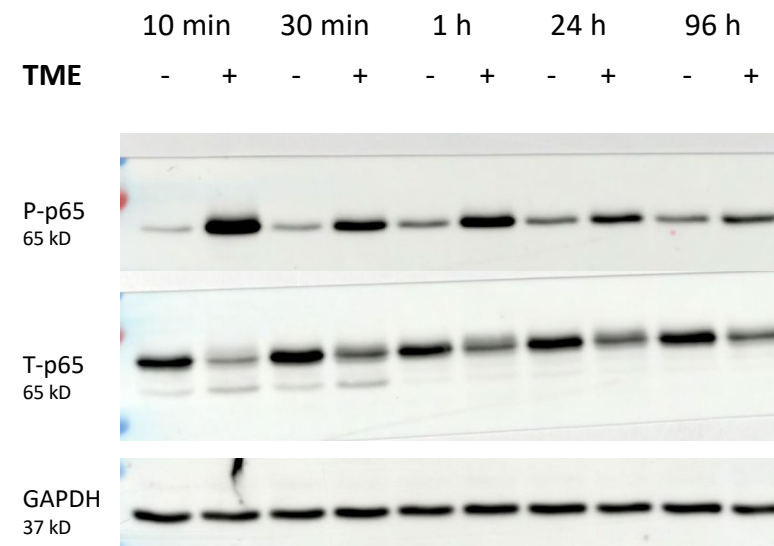

WB raw data  
corresponding to Figure 8A

S727-STAT3 - Stattic

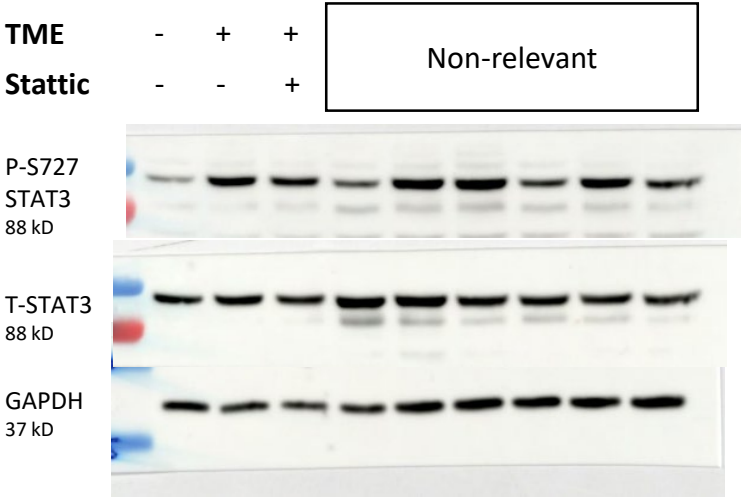

Y705-STAT3 - Stattic

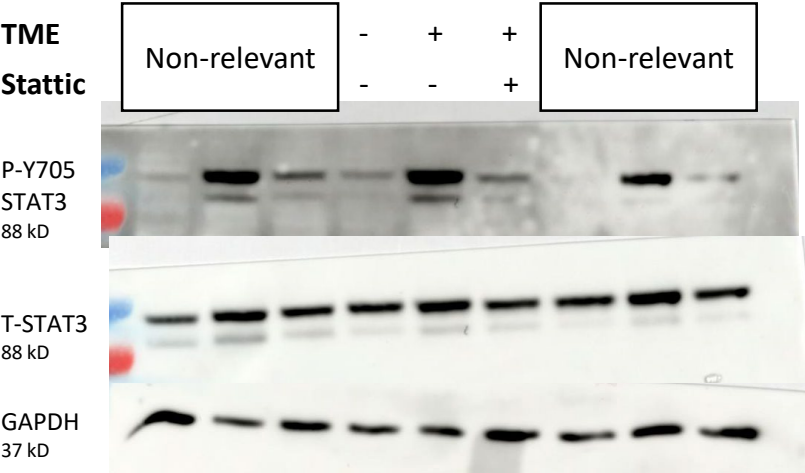

STAT1 - Stattic

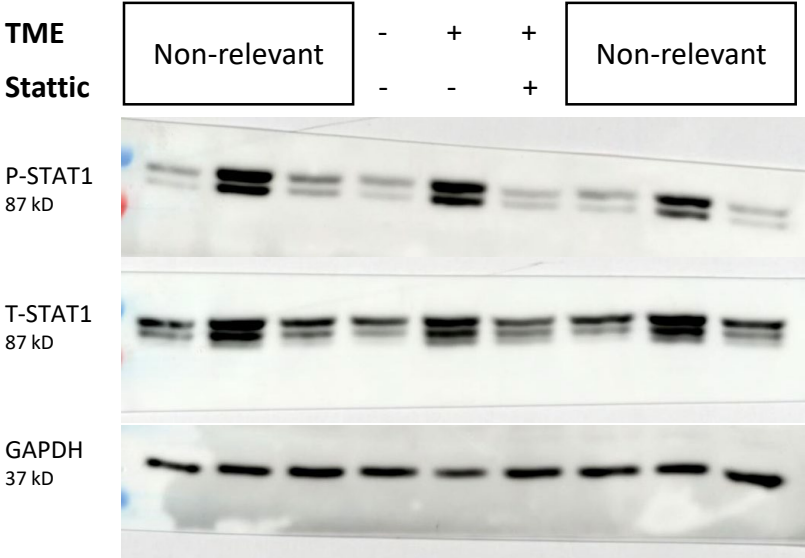

p65 - Stattic

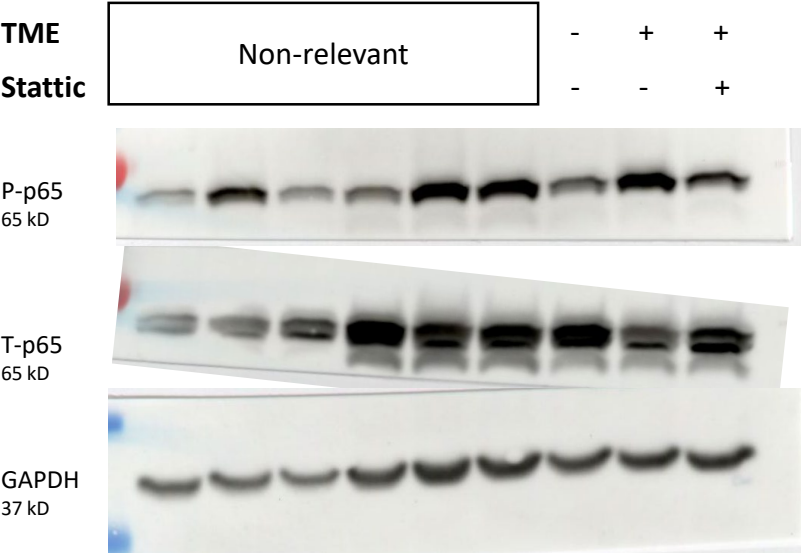

WB raw data  
corresponding to Figure 8B

S727-STAT3 - siSTAT3

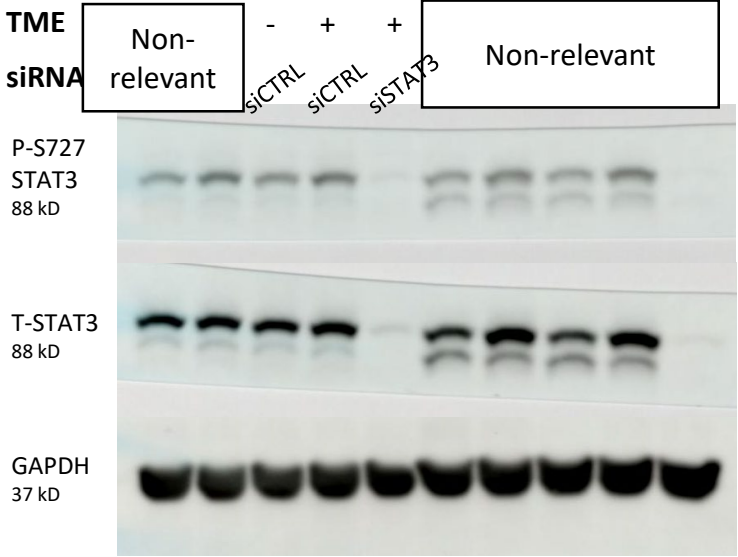

Y705-STAT3 - siSTAT3

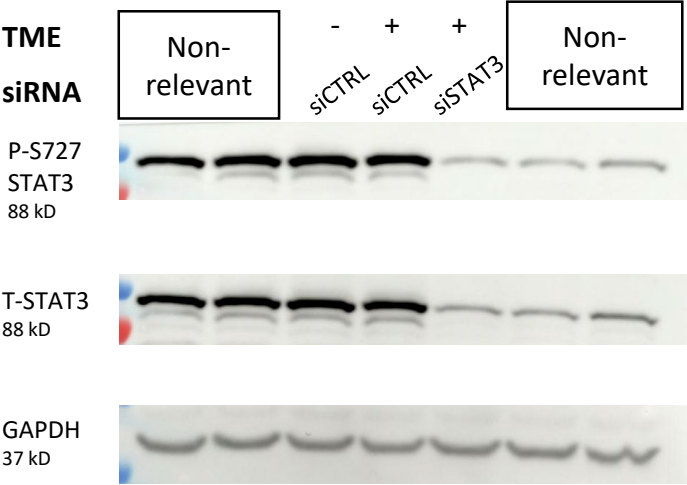

STAT1 - siSTAT3

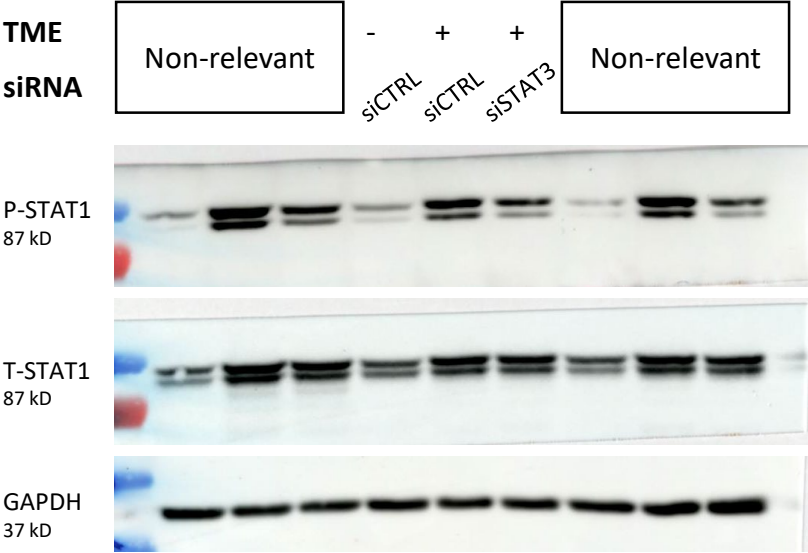

p65 - siSTAT3

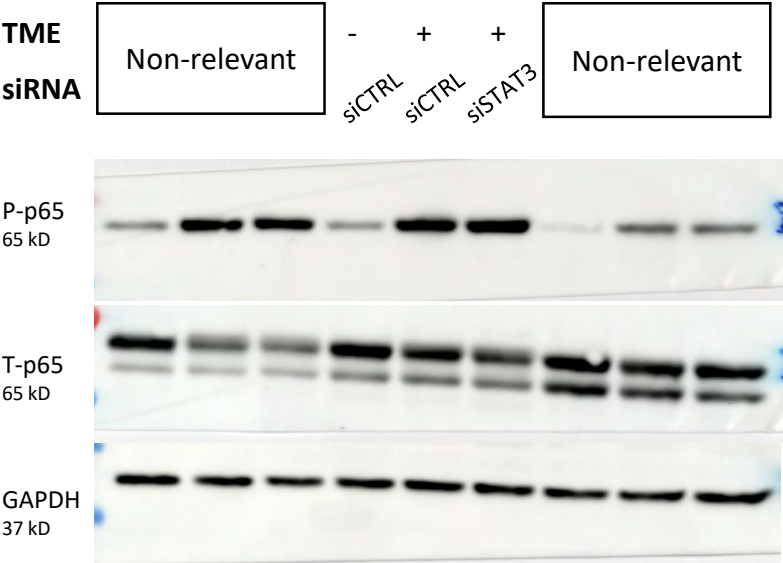

WB raw data  
corresponding to Figure 9

**STAT1 - siSTAT1 Validation**

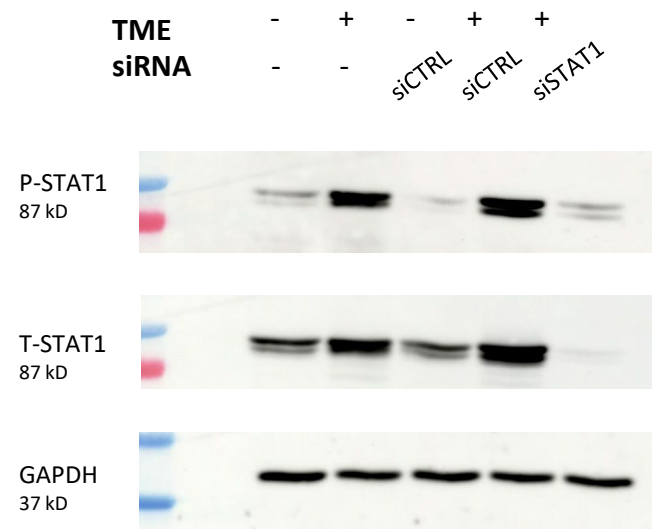

WB raw data  
corresponding to Figure 10

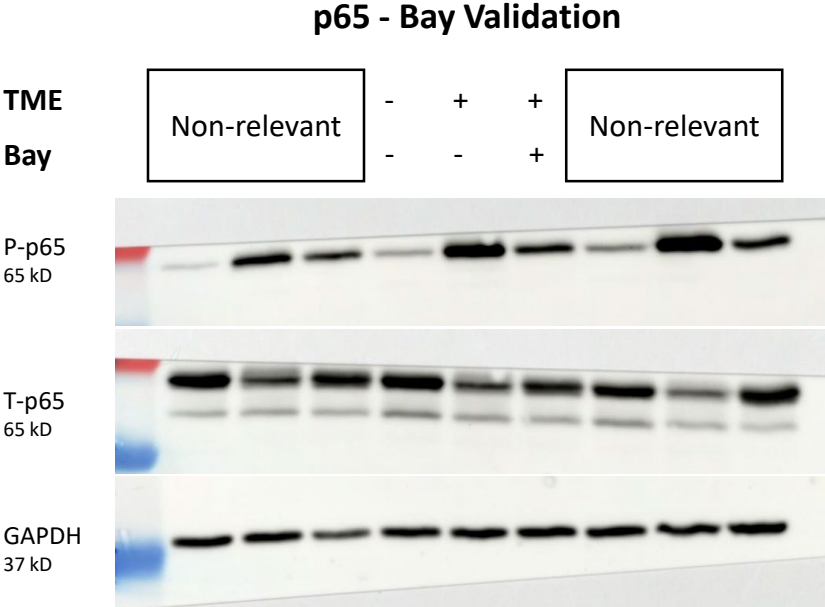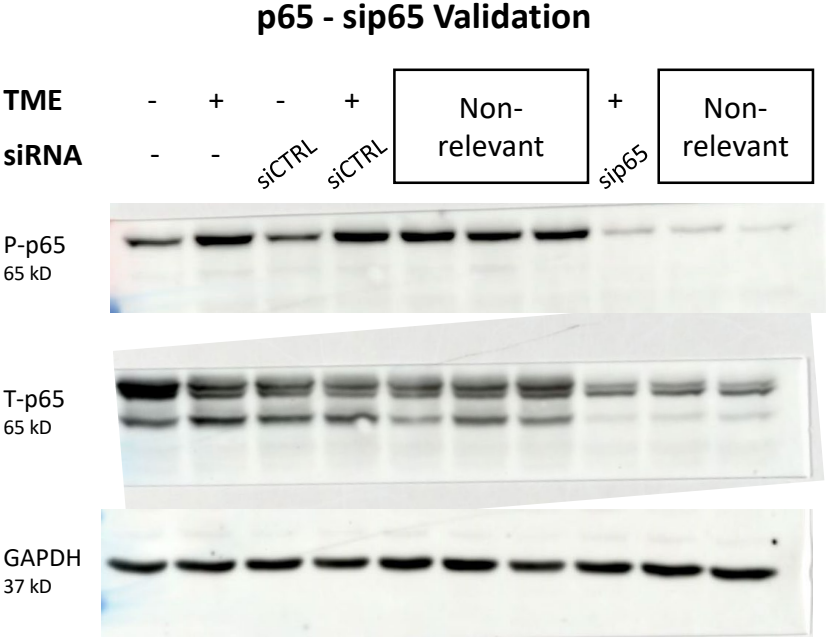



WB raw data  
corresponding to Figure 12

**Y705A-STAT3 - Mutant Validation**

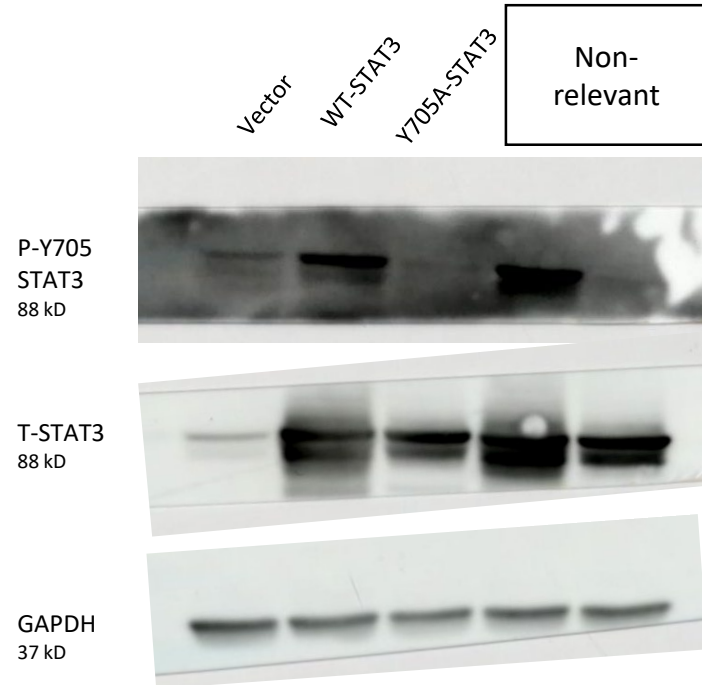

WB raw data  
corresponding to Figure S1

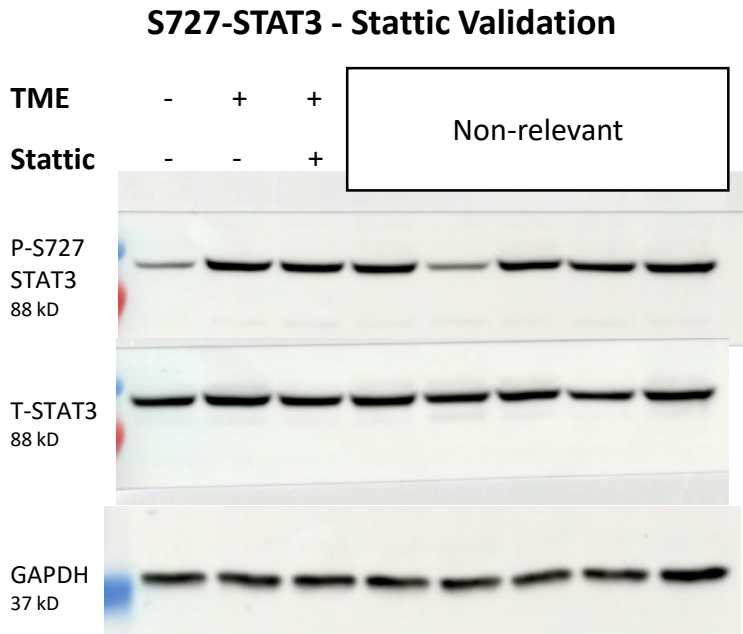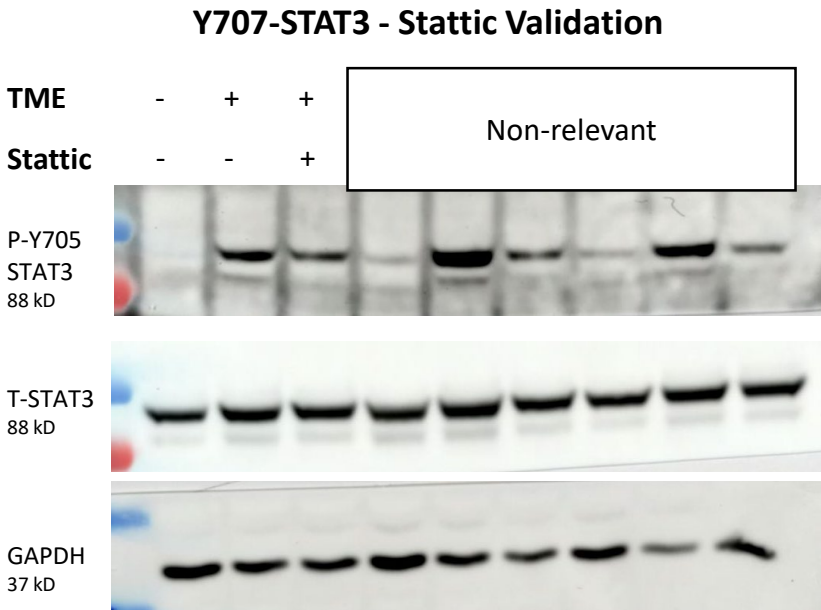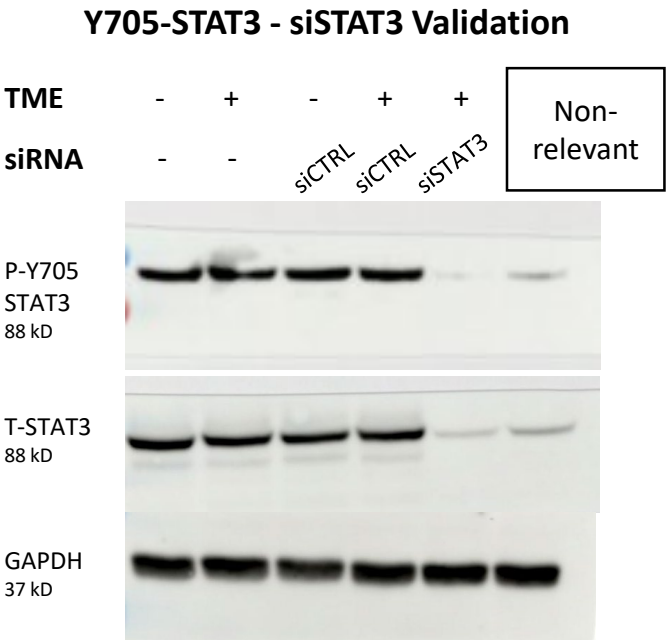

WB raw data  
corresponding to Figure S3

p65 - Bay Validation

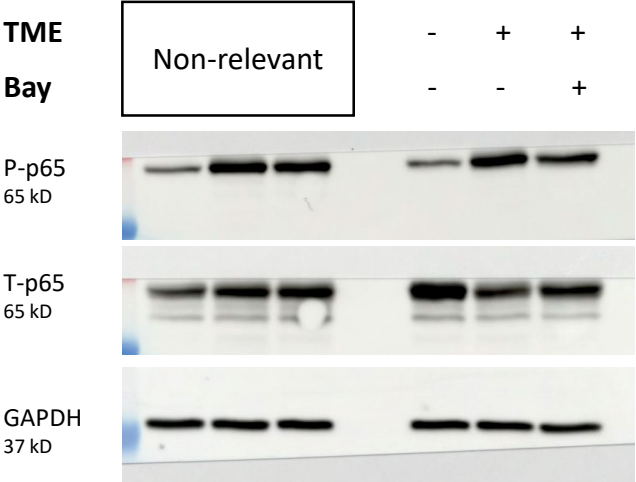

Supplement: s1 [file s1]
