# Supplementary material for: A Tumor Microenvironment-Driven Network Regulated by STAT3 and p65 Negatively Controls the Enrichment of Cancer Stem Cells in Human HR+/HER2− Breast Cancer
Source: MDPI journal article supplement (doi:10.3390/cancers15082255), 2023-04-12
Supplement: s1 [file s1]

A. Up-regulated genes

| Gene       | FDR step up | Fold change | Gene symbol | FDR step up | Fold change |
|------------|-------------|-------------|-------------|-------------|-------------|
| BIRC3      | 2.E-53      | 78.12       | DAPP1       | 3.E-18      | 11.83       |
| LINC02015  | 3.E-41      | 63.41       | TRAF1       | 2.E-27      | 11.63       |
| SAMD9L     | 6.E-25      | 61.72       | NPHS1       | 1.E-13      | 11.40       |
| TCIM       | 3.E-23      | 56.02       | ERAP2       | 5.E-21      | 10.75       |
| S100A9     | 1.E-41      | 55.66       | TNFAIP3     | 2.E-49      | 10.51       |
| TLR6       | 1.E-14      | 39.23       | SOD2        | 6.E-52      | 10.37       |
| IL6        | 6.E-13      | 38.99       | AL391056.1  | 7.E-25      | 10.37       |
| GBP1       | 8.E-49      | 34.36       | KRT8P18     | 2.E-08      | 9.82        |
| TRIM22     | 1.E-36      | 28.63       | C15orf48    | 5.E-15      | 9.70        |
| C1S        | 2.E-25      | 24.88       | AC013444.1  | 5.E-10      | 9.56        |
| KLHDC7B    | 2.E-68      | 24.22       | RHEBL1      | 1.E-15      | 9.51        |
| IRAK2      | 2.E-41      | 21.91       | BTN3A3      | 2.E-16      | 9.38        |
| CTSS       | 1.E-14      | 21.48       | LAMC2       | 1.E-35      | 9.24        |
| C3         | 8.E-36      | 20.33       | RSAD2       | 5.E-25      | 9.00        |
| IFNB1      | 4.E-10      | 19.59       | ICAM1       | 1.E-37      | 8.93        |
| SLC28A3    | 6.E-22      | 19.42       | PTGES       | 4.E-19      | 8.92        |
| CCL22      | 6.E-11      | 19.29       | IGFBP6      | 3.E-04      | 8.57        |
| CCDC33     | 1.E-30      | 18.85       | AC099521.2  | 2.E-08      | 8.40        |
| ITGAM      | 7.E-26      | 18.27       | MOB3B       | 2.E-09      | 8.36        |
| ARHGEF38   | 8.E-37      | 17.11       | AC004264.1  | 1.E-13      | 8.34        |
| GBP4       | 5.E-19      | 16.71       | FGD6        | 8.E-38      | 8.05        |
| STRA6      | 3.E-44      | 16.22       | MMP9        | 3.E-22      | 7.96        |
| IFNL1      | 8.E-15      | 15.46       | IFI44       | 2.E-22      | 7.91        |
| CXCL8      | 9.E-16      | 15.35       | CD74        | 1.E-14      | 7.74        |
| IFIT2      | 1.E-35      | 13.81       | SDR16C5     | 4.E-12      | 7.70        |
| LCN2       | 2.E-15      | 13.11       | AC013444.2  | 8.E-18      | 7.59        |
| C1R        | 5.E-21      | 12.76       | C4orf54     | 6.E-12      | 7.58        |
| AC006460.2 | 3.E-11      | 12.65       | OASL        | 3.E-19      | 7.41        |
| KRT17      | 4.E-16      | 12.31       | LUCAT1      | 1.E-20      | 7.36        |
| PRAL       | 1.E-04      | 12.02       | AC145098.2  | 4.E-38      | 7.34        |

B. Down-regulated genes

| Gene       | FDR step up | Fold change | Gene      | FDR step up | Fold change |
|------------|-------------|-------------|-----------|-------------|-------------|
| RAMP3      | 2.E-73      | 153.06-     | ADCY1     | 2.E-97      | 32.48-      |
| AC138811.2 | 9.E-43      | 110.27-     | CLSTN2    | 4.E-75      | 31.99-      |
| APOD       | 8.E-21      | 81.83-      | E2F1      | 6.E-50      | 31.55-      |
| IQGAP3     | 6.E-85      | 68.82-      | HJURP     | 2.E-47      | 31.50-      |
| HIST1H3B   | 6.E-77      | 66.42-      | ASPM      | 2.E-67      | 30.85-      |
| MYBL2      | 3.E-26      | 65.44-      | MCM10     | 2.E-49      | 30.36-      |
| SCUBE2     | 6.E-36      | 63.12-      | MALRD1    | 8.E-67      | 30.09-      |
| UHRF1      | 4.E-58      | 56.83-      | KIF15     | 1.E-35      | 29.50-      |
| AC112777.1 | 1.E-32      | 55.87-      | SPC24     | 5.E-45      | 28.74-      |
| MKI67      | 2.E-106     | 55.53-      | CDK1      | 3.E-38      | 28.13-      |
| CDC45      | 5.E-36      | 54.40-      | TROAP     | 8.E-64      | 28.01-      |
| MMP16      | 3.E-23      | 49.40-      | HIST1H2AJ | 3.E-25      | 27.89-      |
| GTSE1      | 4.E-34      | 47.83-      | KCNJ3     | 4.E-52      | 27.75-      |
| PRR11      | 8.E-85      | 46.50-      | PLXNA4    | 3.E-45      | 27.60-      |
| TOP2A      | 4.E-85      | 46.18-      | ANLN      | 4.E-58      | 26.96-      |
| AURKB      | 6.E-45      | 45.99-      | GFRA1     | 8.E-79      | 26.56-      |
| HIST1H3F   | 3.E-71      | 42.55-      | TMEM64    | 3.E-73      | 26.54-      |
| MYB        | 1.E-65      | 41.97-      | CENPF     | 6.E-78      | 26.11-      |
| BIRC5      | 5.E-57      | 38.35-      | HIST1H4A  | 1.E-40      | 25.91-      |
| RRM2       | 5.E-28      | 37.27-      | ANXA6     | 1.E-11      | 25.87-      |
| SPDEF      | 1.E-28      | 36.37-      | FOXM1     | 9.E-69      | 25.81-      |
| KIF18B     | 4.E-48      | 36.30-      | FREM2     | 2.E-55      | 25.53-      |
| CDCA3      | 2.E-42      | 35.91-      | IGFBP5    | 2.E-17      | 25.30-      |
| KIF4A      | 6.E-37      | 35.11-      | DTL       | 5.E-27      | 24.99-      |
| HIST1H3C   | 8.E-57      | 34.00-      | ZNF367    | 8.E-38      | 24.76-      |
| NCAPH      | 2.E-39      | 33.46-      | KIF2C     | 6.E-44      | 24.64-      |
| TFF3       | 2.E-07      | 33.46-      | NCAPG     | 3.E-29      | 23.91-      |
| KIF20A     | 5.E-57      | 33.43-      | GSTM3     | 2.E-81      | 23.79-      |
| HIST1H1B   | 2.E-83      | 32.63-      | HIST1H3G  | 1.E-58      | 23.16-      |
| ACKR3      | 5.E-21      | 32.61-      | ATP8A2    | 5.E-22      | 22.93-      |

**Table S2: Comparison of TME-stimulated CSCs and non-stimulated cells: 60 top up-regulated genes and 60 top down-regulated genes**  
RNAseq analyses were performed on TME-stimulated CSCs and on non-stimulated cells (MCF-7 cells), as described in Figure 2. The Table demonstrates **(A)** 60 genes that were most up-regulated in TME-stimulated CSCs compared to non-stimulated cells and **(B)** 60 genes that were most down-regulated in TME-stimulated CSCs compared to non-stimulated cells.

## A. Up-regulated genes

| Gene      | FDR step up | Fold change |
|-----------|-------------|-------------|
| LINC02015 | 2.E-57      | 134.81      |
| SAMD9L    | 2.E-33      | 121.66      |
| TCIM      | 4.E-30      | 100.03      |
| BIRC3     | 2.E-58      | 95.64       |
| IL6       | 3.E-17      | 72.32       |
| CXCL8     | 4.E-36      | 63.76       |
| GBP1      | 2.E-64      | 58.32       |
| C1S       | 9.E-40      | 56.62       |
| S100A9    | 2.E-41      | 55.40       |
| TRIM22    | 2.E-52      | 55.05       |
| CLDN1     | 9.E-14      | 41.22       |
| TLR6      | 7.E-14      | 36.22       |
| CALD1     | 1.E-08      | 35.73       |
| ITGAM     | 1.E-36      | 31.74       |
| CTSS      | 4.E-18      | 31.09       |
| GBP4      | 2.E-27      | 29.70       |
| DAPP1     | 4.E-32      | 26.98       |
| C3        | 1.E-42      | 26.87       |
| IFNB1     | 2.E-11      | 24.33       |
| C1R       | 2.E-31      | 22.96       |
| PRAL      | 2.E-06      | 21.63       |
| SLC28A3   | 5.E-23      | 20.97       |
| KRT17     | 2.E-22      | 19.88       |
| KLHDC7B   | 3.E-59      | 19.47       |
| IRAK2     | 1.E-37      | 19.15       |
| IFIT2     | 1.E-42      | 17.91       |
| C4orf54   | 2.E-22      | 16.66       |
| IFI44L    | 1.E-15      | 15.78       |
| IFI44     | 4.E-39      | 15.46       |
| LAMC2     | 1.E-52      | 15.07       |

| Gene       | FDR step up | Fold change |
|------------|-------------|-------------|
| ARHGEF38   | 1.E-32      | 14.60       |
| RSAD2      | 2.E-36      | 14.35       |
| CCL22      | 6.E-09      | 14.27       |
| IFNL1      | 7.E-14      | 14.20       |
| BTN3A3     | 1.E-22      | 14.01       |
| C15orf48   | 7.E-20      | 13.80       |
| TLR2       | 3.E-33      | 13.77       |
| TNFAIP3    | 1.E-60      | 13.55       |
| TMEM156    | 9.E-17      | 13.48       |
| SOD2       | 8.E-63      | 13.16       |
| ERAP2      | 3.E-24      | 12.90       |
| DDX60L     | 5.E-39      | 12.29       |
| AC006460.2 | 1.E-10      | 12.03       |
| CASC15     | 3.E-30      | 11.93       |
| IFIT3      | 3.E-32      | 11.27       |
| TRAF1      | 5.E-26      | 10.99       |
| ICAM1      | 4.E-44      | 10.75       |
| MMP13      | 3.E-13      | 10.53       |
| FGD6       | 6.E-47      | 10.25       |
| MMP9       | 7.E-28      | 10.21       |
| XAF1       | 2.E-29      | 10.12       |
| NPHS1      | 7.E-12      | 9.70        |
| STRA6      | 4.E-29      | 9.59        |
| LCN2       | 7.E-12      | 9.55        |
| PLS3       | 8.E-05      | 9.28        |
| CCDC33     | 2.E-17      | 9.20        |
| MX2        | 1.E-21      | 9.11        |
| RTP4       | 2.E-08      | 8.73        |
| SAMD9      | 5.E-39      | 8.71        |
| BTN3A1     | 2.E-19      | 8.67        |

## B. Down-regulated genes

| Gene       | FDR step up | Fold change |
|------------|-------------|-------------|
| RAMP3      | 6.E-69      | 279.71-     |
| KIF18B     | 8.E-51      | 54.08-      |
| MT-RNR1    | 1.E-02      | 46.35-      |
| AC138811.2 | 9.E-48      | 44.09-      |
| BIRC5      | 2.E-59      | 42.69-      |
| HIST1H3B   | 2.E-67      | 39.93-      |
| MYBL2      | 1.E-20      | 37.68-      |
| HIST1H3C   | 3.E-58      | 35.48-      |
| PRR11      | 1.E-79      | 35.34-      |
| HIST1H3F   | 2.E-67      | 35.26-      |
| TROAP      | 4.E-68      | 34.75-      |
| IQGAP3     | 2.E-76      | 34.01-      |
| MKI67      | 2.E-84      | 33.95-      |
| MT-RNR2    | 2.E-02      | 33.66-      |
| AURKB      | 9.E-46      | 32.93-      |
| HIST1H1B   | 2.E-83      | 32.71-      |
| AC112777.1 | 8.E-32      | 31.93-      |
| SPC24      | 4.E-47      | 31.81-      |
| TOP2A      | 3.E-73      | 31.28-      |
| CDC45      | 9.E-36      | 31.05-      |
| KIF4A      | 5.E-37      | 30.96-      |
| CLSTN2     | 2.E-72      | 28.84-      |
| UHRF1      | 4.E-51      | 28.80-      |
| APOD       | 5.E-14      | 28.73-      |
| GTSE1      | 2.E-33      | 28.00-      |
| ADCY1      | 2.E-84      | 25.31-      |
| PCP4       | 2.E-23      | 25.14-      |
| SPDEF      | 1.E-23      | 24.89-      |
| GPR68      | 1.E-28      | 24.60-      |
| KIF2C      | 2.E-44      | 24.01-      |

| Gene      | FDR step up | Fold change |
|-----------|-------------|-------------|
| HJURP     | 9.E-44      | 23.97-      |
| KIF20A    | 2.E-51      | 23.21-      |
| KCNJ3     | 1.E-49      | 22.98-      |
| KIF15     | 3.E-34      | 22.58-      |
| CDCA3     | 2.E-40      | 21.95-      |
| CIT       | 1.E-77      | 21.69-      |
| PLXNA4    | 1.E-40      | 20.99-      |
| MMP16     | 5.E-19      | 20.38-      |
| HIST1H3I  | 3.E-37      | 20.15-      |
| FOXMI     | 1.E-61      | 19.85-      |
| HIST1H2AL | 2.E-35      | 19.80-      |
| DTL       | 2.E-25      | 19.59-      |
| HIST1H4A  | 3.E-36      | 19.27-      |
| E2F1      | 2.E-42      | 19.13-      |
| NCAPH     | 4.E-34      | 18.96-      |
| RRM2      | 4.E-19      | 18.72-      |
| PRRT1B    | 2.E-40      | 18.57-      |
| KIF14     | 9.E-37      | 18.46-      |
| TK1       | 6.E-44      | 18.04-      |
| TICRR     | 3.E-44      | 18.02-      |
| ZNF367    | 2.E-33      | 17.84-      |
| MCM10     | 8.E-43      | 17.71-      |
| ESPL1     | 5.E-67      | 17.64-      |
| PCDH10    | 5.E-40      | 17.55-      |
| TP73      | 2.E-29      | 17.53-      |
| ASPM      | 6.E-53      | 17.02-      |
| CDC20     | 5.E-27      | 16.98-      |
| HIST1H3G  | 4.E-50      | 16.90-      |
| CDK1      | 4.E-33      | 16.90-      |
| PRC1      | 2.E-52      | 16.84-      |

**Table S3: Comparison of TME-stimulated Non-CSCs and non-stimulated cells: 60 top up-regulated genes and 60 top down-regulated genes**

RNAseq analyses were performed on TME-stimulated Non-CSCs and on non-stimulated cells (MCF-7 cells), as described in Figure 2. The Table demonstrates **(A)** 60 genes that were most up-regulated in TME-stimulated Non-CSCs compared to non-stimulated cells and **(B)** 60 genes that were most down-regulated in TME-stimulated Non-CSCs compared to non-stimulated cells.

## A. Up-regulated genes

| Gene       | FDR step up | Fold change |
|------------|-------------|-------------|
| ZFP91-CNTF | 6.E-07      | 3.81        |
| SMIM15-AS1 | 2.E-02      | 2.97        |
| MKRN5P     | 2.E-02      | 2.71        |
| LRRC4B     | 1.E-02      | 2.70        |
| IL17REL    | 2.E-02      | 2.30        |
| MUC3A      | 4.E-02      | 2.18        |
| CYP2W1     | 3.E-02      | 2.05        |
| CCDC33     | 1.E-02      | 2.05        |
| AC069281.2 | 3.E-02      | 1.99        |
| PYGM       | 4.E-02      | 1.88        |
| LINC00511  | 2.E-02      | 1.88        |
| PERM1      | 1.E-02      | 1.84        |
| SLC7A5P2   | 3.E-02      | 1.74        |
| C17orf82   | 2.E-02      | 1.69        |
| STRA6      | 5.E-02      | 1.69        |
| CD44       | 2.E-02      | 1.66        |
| ADIRF-AS1  | 3.E-02      | 1.66        |
| SSPO       | 5.E-02      | 1.64        |
| NEAT1      | 2.E-02      | 1.56        |
| RTKL1-     |             |             |
| TNFRSF6B   | 1.E-02      | 1.54        |
| MYO15B     | 3.E-02      | 1.48        |

## B. Down-regulated genes

| Gene       | FDR step up | Fold change |
|------------|-------------|-------------|
| CALD1      | 1.E-02      | 7.61-       |
| ACTG2      | 5.E-05      | 7.38-       |
| MATN3      | 2.E-03      | 6.41-       |
| CLDN1      | 5.E-03      | 6.20-       |
| AL590004.3 | 3.E-07      | 5.37-       |
| MID1       | 4.E-04      | 5.24-       |
| KIF5C      | 1.E-07      | 5.18-       |
| DIO2       | 3.E-05      | 5.08-       |
| SNORA12    | 5.E-05      | 5.04-       |
| COL12A1    | 6.E-05      | 4.93-       |
| PLS3       | 4.E-02      | 4.87-       |
| SNORA79B   | 4.E-04      | 4.77-       |
| SNORD10    | 2.E-05      | 4.60-       |
| TP63       | 6.E-07      | 4.56-       |
| NT5E       | 8.E-07      | 4.44-       |
| SNORA57    | 3.E-06      | 4.30-       |
| BCL2       | 9.E-07      | 4.30-       |
| ANXA6      | 4.E-02      | 4.29-       |
| ITGB6      | 1.E-11      | 4.21-       |
| TENM3      | 3.E-07      | 4.18-       |
| CXCL8      | 2.E-08      | 4.15-       |
| SNORA73B   | 6.E-09      | 4.07-       |
| SNORA17B   | 2.E-03      | 4.04-       |
| C14orf132  | 7.E-09      | 3.96-       |
| TGFB2      | 1.E-12      | 3.94-       |
| SCUBE2     | 3.E-03      | 3.75-       |
| DCDC2      | 2.E-03      | 3.72-       |
| SH3BGRL    | 3.E-07      | 3.71-       |
| SNORA2C    | 1.E-04      | 3.69-       |
| TUBA1A     | 1.E-07      | 3.68-       |

| Gene       | FDR step up | Fold change |
|------------|-------------|-------------|
| LINC00052  | 1.E-02      | 3.67-       |
| FSTL4      | 3.E-04      | 3.56-       |
| GPC6       | 1.E-03      | 3.48-       |
| SNORA73A   | 2.E-03      | 3.47-       |
| RNU2-2P    | 1.E-03      | 3.46-       |
| MSRB3      | 1.E-02      | 3.45-       |
| LIN7A      | 2.E-06      | 3.40-       |
| DAB2       | 3.E-02      | 3.34-       |
| SCARNA22   | 6.E-03      | 3.32-       |
| FREM2      | 3.E-06      | 3.32-       |
| SNORD17    | 4.E-03      | 3.32-       |
| SLC26A2    | 3.E-06      | 3.30-       |
| SCARNA5    | 3.E-03      | 3.29-       |
| MACC1      | 1.E-05      | 3.27-       |
| SNORD3A    | 8.E-07      | 3.25-       |
| AC079414.2 | 4.E-02      | 3.18-       |
| AP005263.1 | 1.E-02      | 3.14-       |
| ATP8A2     | 2.E-02      | 3.12-       |
| SNORA49    | 6.E-04      | 3.12-       |
| SEMA3D     | 2.E-05      | 3.07-       |
| IGSF3      | 2.E-02      | 3.04-       |
| RET        | 2.E-04      | 3.02-       |
| AREG       | 3.E-05      | 2.99-       |
| CLEC3A     | 3.E-03      | 2.97-       |
| FAM234B    | 7.E-05      | 2.97-       |
| DSC2       | 2.E-04      | 2.95-       |
| SESN3      | 3.E-04      | 2.94-       |
| FERMT1     | 2.E-02      | 2.93-       |
| MIR205HG   | 4.E-03      | 2.92-       |
| IFI44L     | 3.E-02      | 2.89-       |

**Table S4: Comparison of TME-stimulated CSCs and TME-stimulated Non-CSCs cells: All up-regulated genes and 60 most down-regulated genes**

RNAseq analyses were performed on TME-stimulated CSCs and TME-stimulated Non-CSCs (MCF-7 cells), as described in Figure 2. The Table demonstrates **(A)** All genes that were up-regulated in TME-stimulated CSCs compared to Non-CSCs cells and **(B)** 60 genes that were most down-regulated in TME-stimulated CSCs compared to Non-CSCs cells.

## A. Up-regulated genes

| Gene symbol | CSCs vs. Non-CSCs |             | CSCs vs. No Stimulation |             | Non-CSCs vs. No Stimulation |             |
|-------------|-------------------|-------------|-------------------------|-------------|-----------------------------|-------------|
|             | FDR               | Fold Change | FDR                     | Fold Change | FDR                         | Fold Change |
| CXCL8       | 0.0000            | 4.1543-     | 0.0000                  | 15.3476     | 0.0000                      | 63.7580     |
| IL6ST       | 0.0020            | 2.0894-     | 0.0003                  | 1.9867      | 0.0000                      | 4.1508      |
| CCL22       | 0.7679            | 1.3518      | 0.0000                  | 19.2920     | 0.0000                      | 14.2719     |
| IL6         | 0.1649            | 1.8546-     | 0.0000                  | 38.9928     | 0.0000                      | 72.3155     |
| IL23A       | 0.9182            | 1.0827-     | 0.0001                  | 3.6568      | 0.0000                      | 3.9593      |
| CLCF1       | 0.9586            | 1.0289      | 0.0072                  | 1.6122      | 0.0133                      | 1.5669      |
| LIF         | 0.9900            | 1.0068      | 0.0000                  | 5.5114      | 0.0000                      | 5.4739      |
| IFNB1       | 0.7545            | 1.2417-     | 0.0000                  | 19.5904     | 0.0000                      | 24.3257     |
| CSF1        | 0.2461            | 1.4393-     | 0.0000                  | 4.1829      | 0.0000                      | 6.0202      |
| IL15RA      | 0.8901            | 1.1024-     | 0.0222                  | 1.9486      | 0.0091                      | 2.1481      |
| OSMR        | 0.0591            | 1.7145-     | 0.0000                  | 2.2966      | 0.0000                      | 3.9376      |
| IL20RB      | 0.6164            | 1.3314      | 0.0009                  | 2.7974      | 0.0220                      | 2.1012      |
| IFNGR1      | 0.0515            | 1.6672-     | 0.0000                  | 2.6794      | 0.0000                      | 4.4671      |
| FAS         | 0.9895            | 1.0092      | 0.0000                  | 3.7066      | 0.0000                      | 3.6727      |
| IL16        | 0.5181            | 1.3874      | 0.0278                  | 1.8727      | 0.3392                      | 1.3497      |
| IL6R        | 0.4570            | 1.3330-     | 0.3930                  | 1.2240      | 0.0292                      | 1.6316      |
| LIFR        | 0.5757            | 1.2357-     | 0.1515                  | 1.3527      | 0.0123                      | 1.6716      |

## B. Down-regulated genes

| Gene symbol | CSCs vs. Non-CSC |             | CSCs vs. No Stimulation |             | Non-CSCs vs. No Stimulation |             |
|-------------|------------------|-------------|-------------------------|-------------|-----------------------------|-------------|
|             | FDR              | Fold Change | FDR                     | Fold Change | FDR                         | Fold Change |
| CXCL12      | 0.0216           | 2.1259-     | 0.0000                  | 6.5841-     | 0.0000                      | 3.0970-     |
| IL1R1       | 0.0451           | 2.3117-     | 0.0000                  | 14.2121-    | 0.0000                      | 6.1480-     |
| TPO         | 0.5145           | 1.5279-     | 0.0000                  | 8.6078-     | 0.0000                      | 5.6338-     |
| IL17D       | 0.7930           | 1.1685-     | 0.0002                  | 2.5447-     | 0.0021                      | 2.1778-     |
| EPOR        | 0.9978           | 1.0026-     | 0.0005                  | 2.2340-     | 0.0005                      | 2.2281-     |
| IL10RB      | 0.7128           | 1.1678-     | 0.0032                  | 1.7640-     | 0.0374                      | 1.5105-     |
| IL17RC      | 0.7868           | 1.1219-     | 0.0000                  | 2.3079-     | 0.0001                      | 2.0571-     |
| IL17RB      | 0.9173           | 1.0745-     | 0.0006                  | 2.3322-     | 0.0019                      | 2.1706-     |
| LTBR        | 0.8357           | 1.0857      | 0.0285                  | 1.4359-     | 0.0075                      | 1.5589-     |
| NGFR        | 0.8205           | 1.1872-     | 0.0088                  | 2.2786-     | 0.0418                      | 1.9193-     |
| CCL28       | 0.2033           | 1.5519-     | 0.0049                  | 1.8597-     | 0.4547                      | 1.1983-     |
| CXCR5       | 0.3576           | 1.3874-     | 0.0356                  | 1.5627-     | 0.6206                      | 1.1264-     |
| IL13RA1     | 0.0592           | 1.6326-     | 0.0052                  | 1.6630-     | 0.9349                      | 1.0186-     |
| PRLR        | 0.1683           | 1.4764-     | 0.0002                  | 1.9672-     | 0.1399                      | 1.3324-     |
| IL17RA      | 0.7321           | 1.1495-     | 0.0136                  | 1.5853-     | 0.0994                      | 1.3791-     |
| IL17RE      | 0.2919           | 1.6146-     | 0.0072                  | 2.1041-     | 0.3808                      | 1.3032-     |
| IFNAR1      | 0.0154           | 1.8397-     | 0.1411                  | 1.3314-     | 0.0992                      | 1.3818      |

**Table S6: Cytokines and chemokines that were differentially expressed in TME-stimulated CSCs, TME-stimulated Non-CSCs and non-stimulated cells**

RNAseq analyses were performed on TME-stimulated CSCs, TME-stimulated Non-CSCs and on non-stimulated cells (MCF-7 cells), as described in Figure 2. The Table demonstrates all cytokines and chemokines that were detected in this analysis, sorted to: **(A)** Up-regulated genes in TME-stimulated CSCs, when compared to TME-stimulated Non-CSCs; in TME-stimulated CSCs, when compared to No stimulation; in TME-stimulated Non-CSCs, when compared to No stimulation. **(B)** Down-regulated genes in TME-stimulated CSCs, when compared to TME-stimulated Non-CSCs; in TME-stimulated CSCs, when compared to No stimulation; in TME-stimulated Non-CSCs, when compared to No stimulation. Differentially-expressed genes that passed the cutoff  $FC \geq 2$  or  $FC \leq -2$ , with  $pFDR < 0.05$  are marked in blue.
