# Supplementary material for: A Tumor Microenvironment-Driven Network Regulated by STAT3 and p65 Negatively Controls the Enrichment of Cancer Stem Cells in Human HR+/HER2− Breast Cancer
Source: Cancers (Basel). 2023 Apr 12;15(8):2255. doi: 10.3390/cancers15082255 (PMC10137120; doi:10.3390/cancers15082255)
Supplement: Supplementary file 1 [file cancers-15-02255-s001.zip]

Archive with 5 entries (5 files):
- Ben-Baruch-Fig. S1-10.4.23.pdf
- Ben-Baruch-Fig. S2-10.4.23.pdf
- Ben-Baruch-Supplemenatry Tables-4.4.23.pdf
- Ben-Baruch-Supplementary Table S1-4.4.23.xlsx
- Ben-Baruch-Supplementary Table S5-4.4.23.xlsx
