# Supplementary material for: A Tumor Microenvironment-Driven Network Regulated by STAT3 and p65 Negatively Controls the Enrichment of Cancer Stem Cells in Human HR+/HER2− Breast Cancer
Source: Cancers (Basel). 2023 Apr 12;15(8):2255. doi: 10.3390/cancers15082255 (PMC10137120; doi:10.3390/cancers15082255)
Supplement: Supplementary file 1 [file cancers-15-02255-s001.zip › Ben-Baruch-Supplementary Table S1-4.4.23.xlsx]

## Sheet: Table S1 - CSC vs nonCSC
Gene Symbol	Fold Change
CALD1	7.60818
ACTG2	7.38103
MATN3	6.40579
CLDN1	6.20096
AL590004.3	5.36578
MID1	5.23614
KIF5C	5.17703
DIO2	5.07825
SNORA12	5.04098
COL12A1	4.93173
PLS3	4.86901
SNORA79B	4.7654
SNORD10	4.59506
TP63	4.5583
NT5E	4.44261
SNORA57	4.29848
BCL2	4.29574
ANXA6	4.28671
ITGB6	4.21106
TENM3	4.17885
CXCL8	4.15427
SNORA73B	4.06745
SNORA17B	4.04392
C14orf132	3.95778
TGFB2	3.9391
SCUBE2	3.75177
DCDC2	3.72335
SH3BGRL	3.71441
SNORA2C	3.69353
TUBA1A	3.68072
LINC00052	3.66735
FSTL4	3.56138
GPC6	3.47925
SNORA73A	3.46886
RNU2-2P	3.46088
MSRB3	3.45264
LIN7A	3.39699
DAB2	3.33899
SCARNA22	3.32054
FREM2	3.31665
SNORD17	3.31605
SLC26A2	3.29799
SCARNA5	3.29452
MACC1	3.26749
SNORD3A	3.25323
AC079414.2	3.17613
AP005263.1	3.14194
ATP8A2	3.12454
SNORA49	3.11671
SEMA3D	3.06731
IGSF3	3.03798
RET	3.01908
AREG	2.994
CLEC3A	2.97325
FAM234B	2.97231
DSC2	2.94888
SESN3	2.93912
FERMT1	2.92958
MIR205HG	2.91883
IFI44L	2.89074
PCDH9	2.88529
AOX1	2.86482
EDN1	2.85915
KATNAL1	2.85773
ABAT	2.81159
SLC25A30	2.77778
TLR2	2.75199
SNORA48	2.74997
GPX8	2.73809
CD109	2.73397
ARL15	2.72445
PRICKLE1	2.71546
SERPINA5	2.69377
CACNG4	2.69196
SHISA2	2.68901
SLC7A11	2.68734
DPY19L1	2.6873
SCD5	2.68655
ABCG2	2.67363
LAMB1	2.67242
CCN2	2.64538
FAM84A	2.64357
CADM1	2.62868
LGALS3BP	2.62732
PALLD	2.62726
ST8SIA4	2.62492
HLA-DQB1	2.61878
PXDN	2.6171
RN7SKP203	2.61667
FAT1	2.60391
DNAH5	2.60172
MYB	2.59427
ARHGAP29	2.59333
SNORD15B	2.58946
DDX60L	2.57668
CXADR	2.57541
EFR3B	2.57524
KRT8P10	2.57496
SDC2	2.56339
RAB9B	2.56135
PCDHB2	2.5598
TMEM19	2.55369
SEMA3E	2.55032
ADGRG6	2.53253
AMER2	2.5259
MARCKS	2.52519
SNORA71A	2.524
TMEM63C	2.51936
ITGA2	2.51875
ONECUT2	2.51542
PARP8	2.51096
AC104662.2	2.5034
HTRA1	2.50066
HMGCLL1	2.49649
ZNF608	2.49544
THBS1	2.47563
SAMD9	2.47382
TMEM150C	2.47122
EMB	2.45909
DSG2	2.45679
FJX1	2.45519
SLC12A2	2.45356
FRK	2.44005
PKIB	2.40961
UGT1A6	2.40677
SCARNA10	2.39984
DNAJC22	2.39938
APBB2	2.39681
SLC39A6	2.38943
AC005261.5	2.37536
GSN	2.37165
PAPSS2	2.37097
L1CAM	2.36654
MGAT4A	2.36053
ALG10B	2.35688
DLC1	2.35524
LIPH	2.35049
TMEM64	2.34905
ZNF711	2.34776
FN1	2.34641
FAM102B	2.34356
GPR37	2.34258
CMPK2	2.33862
CD24	2.3298
RN7SKP255	2.32904
NEDD4	2.31922
PDLIM1	2.31749
SH3BGRL2	2.31178
IL1R1	2.31168
CRNDE	2.3026
B3GLCT	2.30042
NUAK1	2.29344
CERS6	2.28966
DAPP1	2.28028
TGFBI	2.28007
EGFR	2.27653
C1S	2.27553
UBL3	2.2717
MAP9	2.26337
EFNB3	2.26286
KIF3C	2.25231
ST8SIA6	2.24167
TACSTD2	2.24057
PODXL	2.23997
CDK6	2.23567
BDKRB2	2.23205
ELOVL7	2.23188
ANTXR1	2.22977
VANGL1	2.22728
TMEM156	2.21952
TSPAN6	2.21944
RERG	2.21649
ATP1B1	2.20643
FAM111B	2.20602
ANLN	2.20261
ETV5	2.20019
C4orf54	2.19883
PDE10A	2.19704
NCOA7	2.19641
SGMS2	2.19551
CLIC4	2.19373
RCN1	2.19185
SMYD2	2.18798
CLSTN3	2.18755
KLF12	2.18627
SACS	2.18457
TMED7	2.18434
RN7SK	2.18331
RAB36	2.18281
RCAN3	2.18228
ARMT1	2.18215
ZMPSTE24	2.17983
SMIM30	2.17981
TRIM2	2.17934
PCMTD2	2.1724
EPHA4	2.16969
TUSC3	2.16859
GMFB	2.1683
GOLT1B	2.16812
CLU	2.16684
SYTL5	2.16046
STK38L	2.159
PAQR5	2.15687
ANKRD18EP	2.15393
NRP1	2.15364
PON2	2.14294
GNB4	2.1359
PTGFRN	2.13566
RAI14	2.13339
COCH	2.13324
MALRD1	2.12908
ITGA6	2.12698
SLC6A14	2.12611
LINC02015	2.12602
CXCL12	2.12592
GABBR2	2.11798
SYT10	2.1179
SLC16A7	2.11673
QSOX1	2.11312
SCARA3	2.10906
SLC30A1	2.10889
ENPP5	2.10496
LNPEP	2.10462
GALC	2.10336
PAM	2.0993
RAB32	2.09878
IL6ST	2.08935
AJUBA	2.08907
TMEM170B	2.08236
NPY1R	2.0787
EGR3	2.0771
OPN3	2.07544
MEX3A	2.07536
RNF144B	2.0749
COL5A1	2.07407
PCSK1N	2.07397
MOB1B	2.07175
FRMD6	2.07123
PPP1R3C	2.07075
KRT8P3	2.06675
SORL1	2.06229
MFSD6	2.06193
CRIM1	2.06043
WIPF1	2.05775
RF00100	2.05665
CAV1	2.0541
PIK3R1	2.05249
TMEM106B	2.05201
LOXL2	2.0507
MMGT1	2.05061
C1QTNF6	2.0483
PANK3	2.0475
AC007996.1	2.04686
CALM2	2.04674
LAPTM4A	2.04555
TGFBR2	2.0429
GPR158	2.03779
SCAMP1	2.03371
ZNF680	2.03096
ZNF107	2.02509
ALG10	2.02366
IQGAP3	2.02332
IGFBP2	2.02256
SCARNA12	2.02003
STARD13	2.02001
BMI1	2.01859
GSTM3	2.01661
GLRA3	2.01393
ALCAM	2.0134
CCND1	2.01196
ITGAV	2.01007
ANKRD50	2.00979
NRAS	2.00887
ECE1	2.00731
CENPF	2.00713
SELENOI	2.00685
SLC16A9	2.00581
SGCB	2.00382
TACC1	2.00321
