# Supplementary material for: A Tumor Microenvironment-Driven Network Regulated by STAT3 and p65 Negatively Controls the Enrichment of Cancer Stem Cells in Human HR+/HER2− Breast Cancer
Source: Cancers (Basel). 2023 Apr 12;15(8):2255. doi: 10.3390/cancers15082255 (PMC10137120; doi:10.3390/cancers15082255)
Supplement: Supplementary file 1 [file cancers-15-02255-s001.zip › Ben-Baruch-Supplementary Table S5-4.4.23.xlsx]

## Sheet: Up in CSC vs. No stimulation
term_name	term_id	adjusted_p_value
immune response	GO:0006955	9.01441e-20
response to other organism	GO:0051707	9.27707e-20
response to external biotic stimulus	GO:0043207	1.00412e-19
defense response	GO:0006952	1.819e-19
response to biotic stimulus	GO:0009607	2.69533e-19
biological process involved in interspecies interaction between organisms	GO:0044419	6.06024e-19
defense response to other organism	GO:0098542	2.20698e-18
innate immune response	GO:0045087	4.82441e-18
response to virus	GO:0009615	3.39355e-17
defense response to virus	GO:0051607	3.31853e-16
defense response to symbiont	GO:0140546	3.61326e-16
response to external stimulus	GO:0009605	1.68359e-15
immune system process	GO:0002376	4.25147e-15
response to cytokine	GO:0034097	1.04998e-12
response to stress	GO:0006950	1.16903e-10
cellular response to cytokine stimulus	GO:0071345	1.04249e-09
regulation of immune response	GO:0050776	2.19928e-09
positive regulation of response to stimulus	GO:0048584	3.04631e-09
inflammatory response	GO:0006954	4.12708e-09
regulation of cytokine production	GO:0001817	4.13419e-08
cytokine production	GO:0001816	5.07839e-08
response to stimulus	GO:0050896	5.48931e-08
regulation of immune system process	GO:0002682	6.9526e-08
pattern recognition receptor signaling pathway	GO:0002221	1.37715e-07
positive regulation of signal transduction	GO:0009967	1.79549e-07
cytoplasmic pattern recognition receptor signaling pathway	GO:0002753	2.0637e-07
cytokine-mediated signaling pathway	GO:0019221	3.44771e-07
response to organic substance	GO:0010033	7.09096e-07
regulation of response to stimulus	GO:0048583	1.20428e-06
positive regulation of cell communication	GO:0010647	1.42748e-06
positive regulation of signaling	GO:0023056	1.55048e-06
regulation of response to external stimulus	GO:0032101	1.66675e-06
I-kappaB kinase/NF-kappaB signaling	GO:0007249	2.25908e-06
positive regulation of cytokine production	GO:0001819	5.74626e-06
adaptive immune response based on somatic recombination of immune receptors built from immunoglobulin superfamily domains	GO:0002460	6.81724e-06
cell surface receptor signaling pathway	GO:0007166	7.18042e-06
positive regulation of response to cytokine stimulus	GO:0060760	8.24841e-06
intracellular signal transduction	GO:0035556	1.06317e-05
positive regulation of immune response	GO:0050778	1.0699e-05
cellular response to chemical stimulus	GO:0070887	1.29942e-05
positive regulation of response to external stimulus	GO:0032103	1.47174e-05
positive regulation of immune system process	GO:0002684	1.74947e-05
T cell mediated immunity	GO:0002456	1.84491e-05
regulation of multicellular organismal process	GO:0051239	1.90194e-05
regulation of defense response	GO:0031347	1.97272e-05
regulation of intracellular signal transduction	GO:1902531	2.34405e-05
regulation of type 2 immune response	GO:0002828	2.69506e-05
regulation of signal transduction	GO:0009966	2.6952e-05
NIK/NF-kappaB signaling	GO:0038061	2.79634e-05
regulation of response to cytokine stimulus	GO:0060759	3.53419e-05
response to interferon-gamma	GO:0034341	3.75309e-05
regulation of leukocyte mediated immunity	GO:0002703	3.93113e-05
adaptive immune response	GO:0002250	4.40637e-05
type 2 immune response	GO:0042092	5.65041e-05
cellular response to virus	GO:0098586	5.78637e-05
positive regulation of biological process	GO:0048518	6.11542e-05
positive regulation of gene expression	GO:0010628	6.71868e-05
immune response-regulating signaling pathway	GO:0002764	7.53852e-05
leukocyte mediated immunity	GO:0002443	7.56492e-05
cellular response to organic substance	GO:0071310	7.66658e-05
immune effector process	GO:0002252	7.69383e-05
response to chemical	GO:0042221	7.89438e-05
regulation of viral life cycle	GO:1903900	8.51029e-05
positive regulation of multicellular organismal process	GO:0051240	8.65292e-05
nucleotide-binding oligomerization domain containing signaling pathway	GO:0070423	9.42618e-05
regulation of immune effector process	GO:0002697	9.59784e-05
response to bacterium	GO:0009617	9.76094e-05
regulation of cell adhesion	GO:0030155	0.00010773
nucleotide-binding domain, leucine rich repeat containing receptor signaling pathway	GO:0035872	0.000127421
positive regulation of interleukin-6 production	GO:0032755	0.000129789
regulation of response to stress	GO:0080134	0.00014061
regulation of pattern recognition receptor signaling pathway	GO:0062207	0.000141766
toll-like receptor signaling pathway	GO:0002224	0.00015279
regulation of apoptotic signaling pathway	GO:2001233	0.000169081
regulation of inflammatory response	GO:0050727	0.000169128
lymphocyte mediated immunity	GO:0002449	0.000204104
humoral immune response	GO:0006959	0.000247025
cellular response to interleukin-1	GO:0071347	0.000249618
T cell activation involved in immune response	GO:0002286	0.000251614
positive regulation of tumor necrosis factor production	GO:0032760	0.000329658
regulation of viral process	GO:0050792	0.000384152
regulation of cell communication	GO:0010646	0.000417736
positive regulation of inflammatory response	GO:0050729	0.000443561
negative regulation of cytokine production	GO:0001818	0.000454369
positive regulation of tumor necrosis factor superfamily cytokine production	GO:1903557	0.000476631
myeloid leukocyte differentiation	GO:0002573	0.000477005
regulation of signaling	GO:0023051	0.000477164
positive regulation of DNA-binding transcription factor activity	GO:0051091	0.00050138
cellular response to interferon-gamma	GO:0071346	0.000516854
interleukin-6 production	GO:0032635	0.000581529
regulation of interleukin-6 production	GO:0032675	0.000581529
regulation of phosphate metabolic process	GO:0019220	0.000598024
regulation of phosphorus metabolic process	GO:0051174	0.000609643
regulation of protein phosphorylation	GO:0001932	0.000641587
regulation of multicellular organismal development	GO:2000026	0.000672043
myeloid leukocyte activation	GO:0002274	0.000709086
positive regulation of NF-kappaB transcription factor activity	GO:0051092	0.000733614
response to interleukin-1	GO:0070555	0.000775734
regulation of I-kappaB kinase/NF-kappaB signaling	GO:0043122	0.000842203
regulation of response to biotic stimulus	GO:0002831	0.000854217
positive regulation of intracellular signal transduction	GO:1902533	0.0010135
apoptotic signaling pathway	GO:0097190	0.00108088
positive regulation of immune effector process	GO:0002699	0.00108294
leukocyte differentiation	GO:0002521	0.00118507
negative regulation of viral genome replication	GO:0045071	0.00120547
positive regulation of defense response	GO:0031349	0.00128982
regulation of toll-like receptor signaling pathway	GO:0034121	0.00132016
interferon-beta production	GO:0032608	0.00136418
regulation of interferon-beta production	GO:0032648	0.00136418
response to dsRNA	GO:0043331	0.00138968
positive regulation of I-kappaB kinase/NF-kappaB signaling	GO:0043123	0.00140702
response to molecule of bacterial origin	GO:0002237	0.00151818
regulation of phosphorylation	GO:0042325	0.0015666
positive regulation of protein phosphorylation	GO:0001934	0.00167425
regulation of viral genome replication	GO:0045069	0.00185961
regulation of cytokine-mediated signaling pathway	GO:0001959	0.00193115
regulation of DNA-binding transcription factor activity	GO:0051090	0.00196316
regulation of molecular function	GO:0065009	0.00198493
cell activation	GO:0001775	0.00217637
cell activation involved in immune response	GO:0002263	0.00226416
cellular response to tumor necrosis factor	GO:0071356	0.00290425
nucleotide-binding oligomerization domain containing 2 signaling pathway	GO:0070431	0.00295911
leukocyte activation	GO:0045321	0.00301523
transition metal ion homeostasis	GO:0055076	0.00304598
positive regulation of interferon-beta production	GO:0032728	0.00308093
signal transduction	GO:0007165	0.00314881
viral life cycle	GO:0019058	0.00349268
regulation of tumor necrosis factor production	GO:0032680	0.0035737
tumor necrosis factor production	GO:0032640	0.0035737
regulation of T cell mediated immunity	GO:0002709	0.00411643
T-helper 2 cell cytokine production	GO:0035745	0.00418171
regulation of T-helper 2 cell cytokine production	GO:2000551	0.00418171
tumor necrosis factor superfamily cytokine production	GO:0071706	0.00470545
regulation of tumor necrosis factor superfamily cytokine production	GO:1903555	0.00470545
response to tumor necrosis factor	GO:0034612	0.00479008
vertebrate eye-specific patterning	GO:0150064	0.00501119
positive regulation of interleukin-10 production	GO:0032733	0.00525032
response to exogenous dsRNA	GO:0043330	0.00530918
response to amyloid-beta	GO:1904645	0.00590053
cell adhesion	GO:0007155	0.00615094
positive regulation of cell migration	GO:0030335	0.00617379
regulation of cytokine production involved in immune response	GO:0002718	0.00642928
cytokine production involved in immune response	GO:0002367	0.00642928
response to lipopolysaccharide	GO:0032496	0.00659912
positive regulation of molecular function	GO:0044093	0.00690952
regulation of adaptive immune response	GO:0002819	0.00705116
positive regulation of phosphate metabolic process	GO:0045937	0.00756583
positive regulation of phosphorus metabolic process	GO:0010562	0.00756583
positive regulation of cytokine-mediated signaling pathway	GO:0001961	0.00758331
negative regulation of cell adhesion	GO:0007162	0.00833993
interleukin-8 production	GO:0032637	0.00898866
regulation of interleukin-8 production	GO:0032677	0.00898866
regulation of MHC class I biosynthetic process	GO:0045343	0.00915304
MHC class I biosynthetic process	GO:0045341	0.00915304
cell communication	GO:0007154	0.00936405
positive regulation of leukocyte mediated immunity	GO:0002705	0.00957616
positive regulation of peptidyl-tyrosine phosphorylation	GO:0050731	0.00981764
complement-mediated synapse pruning	GO:0150062	0.010017
toll-like receptor 2 signaling pathway	GO:0034134	0.0100611
positive regulation of protein metabolic process	GO:0051247	0.0106271
regulation of cysteine-type endopeptidase activity involved in apoptotic signaling pathway	GO:2001267	0.0106275
cellular response to stimulus	GO:0051716	0.0106284
neuroinflammatory response	GO:0150076	0.0107637
cell migration	GO:0016477	0.0108476
positive regulation of phosphorylation	GO:0042327	0.0109003
cytoplasmic pattern recognition receptor signaling pathway in response to virus	GO:0039528	0.0126937
protein phosphorylation	GO:0006468	0.0128001
positive regulation of type 2 immune response	GO:0002830	0.0128672
positive regulation of cell motility	GO:2000147	0.0130089
leukocyte activation involved in immune response	GO:0002366	0.0130637
CD4-positive, alpha-beta T cell cytokine production	GO:0035743	0.0140537
negative regulation of leukocyte differentiation	GO:1902106	0.014274
immune system development	GO:0002520	0.0148651
regulation of lymphocyte mediated immunity	GO:0002706	0.0165816
hematopoietic or lymphoid organ development	GO:0048534	0.016953
signaling	GO:0023052	0.01723
positive regulation of cytokine production involved in immune response	GO:0002720	0.0180002
negative regulation of hemopoiesis	GO:1903707	0.0182357
lipid localization	GO:0010876	0.018909
regulation of extrinsic apoptotic signaling pathway	GO:2001236	0.0191796
positive regulation of locomotion	GO:0040017	0.0197616
leukocyte homeostasis	GO:0001776	0.0198405
microglial cell activation	GO:0001774	0.0199558
positive regulation of interleukin-8 production	GO:0032757	0.021104
regulation of adaptive immune response based on somatic recombination of immune receptors built from immunoglobulin superfamily domains	GO:0002822	0.0213672
regulation of cell death	GO:0010941	0.021714
positive regulation of interleukin-12 production	GO:0032735	0.0223222
positive regulation of leukocyte migration	GO:0002687	0.0227959
negative regulation of toll-like receptor 2 signaling pathway	GO:0034136	0.0232422
cell adhesion mediated by integrin	GO:0033627	0.0237143
MyD88-dependent toll-like receptor signaling pathway	GO:0002755	0.024168
leukocyte activation involved in inflammatory response	GO:0002269	0.024179
iron ion homeostasis	GO:0055072	0.025523
regulation of extrinsic apoptotic signaling pathway via death domain receptors	GO:1902041	0.0260205
hemopoiesis	GO:0030097	0.0262401
regulation of apoptotic process	GO:0042981	0.0263113
viral process	GO:0016032	0.0274065
regulation of leukocyte differentiation	GO:1902105	0.0275273
lymphocyte activation involved in immune response	GO:0002285	0.0278173
detection of diacyl bacterial lipopeptide	GO:0042496	0.0285977
toll-like receptor TLR6:TLR2 signaling pathway	GO:0038124	0.0285977
glial cell activation	GO:0061900	0.0289538
viral genome replication	GO:0019079	0.0291186
positive regulation of cell death	GO:0010942	0.0294522
negative regulation of cell activation	GO:0050866	0.0296671
cellular response to molecule of bacterial origin	GO:0071219	0.0298758
positive regulation of myeloid leukocyte mediated immunity	GO:0002888	0.0320877
regulation of programmed cell death	GO:0043067	0.0329098
cell death	GO:0008219	0.0336087
regulation of myeloid leukocyte differentiation	GO:0002761	0.0340727
regulation of catalytic activity	GO:0050790	0.0358015
negative regulation of viral process	GO:0048525	0.0375423
macrophage differentiation	GO:0030225	0.0379717
positive regulation of type I interferon production	GO:0032481	0.0397156
negative regulation of lymphocyte activation	GO:0051250	0.039758
regulation of interferon-gamma production	GO:0032649	0.0397974
positive regulation of protein modification process	GO:0031401	0.0418193
interferon-gamma production	GO:0032609	0.0420423
regulation of cell migration	GO:0030334	0.0445339
leukocyte migration	GO:0050900	0.0464631
myeloid cell differentiation	GO:0030099	0.0488944

## Sheet: Down in CSC vs. No stimulation
term_name	term_id	adjusted_p_value
mitotic cell cycle	GO:0000278	4.01622e-43
mitotic cell cycle process	GO:1903047	1.19592e-42
cell cycle process	GO:0022402	2.25683e-38
cell cycle	GO:0007049	3.3626e-35
regulation of cell cycle process	GO:0010564	6.71717e-30
mitotic nuclear division	GO:0140014	1.48621e-29
organelle organization	GO:0006996	1.09194e-28
nuclear division	GO:0000280	8.4783e-28
cell division	GO:0051301	1.27146e-27
mitotic sister chromatid segregation	GO:0000070	7.21915e-27
sister chromatid segregation	GO:0000819	7.58698e-27
regulation of cell cycle	GO:0051726	3.05457e-26
regulation of cellular component organization	GO:0051128	4.76855e-26
organelle fission	GO:0048285	1.24305e-25
chromosome organization	GO:0051276	6.60997e-25
cellular macromolecule metabolic process	GO:0044260	1.28354e-24
cell cycle phase transition	GO:0044770	4.67792e-24
mitotic cell cycle phase transition	GO:0044772	4.9459e-24
regulation of mitotic cell cycle	GO:0007346	2.29084e-23
organonitrogen compound biosynthetic process	GO:1901566	5.83559e-23
nuclear chromosome segregation	GO:0098813	7.85941e-23
chromosome segregation	GO:0007059	1.28398e-22
cytoplasmic translation	GO:0002181	4.20195e-21
negative regulation of cell cycle process	GO:0010948	6.94066e-21
regulation of mitotic cell cycle phase transition	GO:1901990	1.30475e-20
regulation of cell cycle phase transition	GO:1901987	1.40102e-20
regulation of chromosome segregation	GO:0051983	3.36097e-20
regulation of chromosome separation	GO:1905818	1.22435e-19
negative regulation of cell cycle	GO:0045786	4.0263e-19
DNA-templated DNA replication	GO:0006261	8.08233e-19
chromosome separation	GO:0051304	1.42179e-18
organonitrogen compound metabolic process	GO:1901564	1.84666e-18
regulation of organelle organization	GO:0033043	1.95878e-18
DNA replication	GO:0006260	3.27724e-18
aerobic respiration	GO:0009060	6.57121e-18
negative regulation of cell cycle phase transition	GO:1901988	6.72343e-18
cell cycle checkpoint signaling	GO:0000075	1.90449e-17
G2/M transition of mitotic cell cycle	GO:0000086	2.17975e-17
negative regulation of mitotic cell cycle	GO:0045930	5.18437e-17
cell cycle G2/M phase transition	GO:0044839	5.77089e-17
cytoskeleton organization	GO:0007010	7.4156e-17
DNA metabolic process	GO:0006259	1.59998e-16
negative regulation of mitotic cell cycle phase transition	GO:1901991	1.99283e-16
regulation of mitotic nuclear division	GO:0007088	2.10028e-16
carbohydrate derivative biosynthetic process	GO:1901137	4.02546e-16
regulation of mitotic sister chromatid separation	GO:0010965	4.05206e-16
carbohydrate derivative metabolic process	GO:1901135	6.00711e-16
mitotic cell cycle checkpoint signaling	GO:0007093	8.2214e-16
mitotic sister chromatid separation	GO:0051306	8.31599e-16
organophosphate metabolic process	GO:0019637	1.41059e-15
regulation of sister chromatid segregation	GO:0033045	3.24822e-15
metaphase/anaphase transition of mitotic cell cycle	GO:0007091	4.82823e-15
positive regulation of cell cycle process	GO:0090068	5.55913e-15
cellular respiration	GO:0045333	6.57628e-15
regulation of nuclear division	GO:0051783	7.1873e-15
phosphate-containing compound metabolic process	GO:0006796	8.14899e-15
negative regulation of mitotic nuclear division	GO:0045839	9.49952e-15
metaphase/anaphase transition of cell cycle	GO:0044784	9.69179e-15
phosphorus metabolic process	GO:0006793	1.6308e-14
negative regulation of mitotic sister chromatid separation	GO:2000816	1.98485e-14
negative regulation of mitotic sister chromatid segregation	GO:0033048	1.98485e-14
negative regulation of sister chromatid segregation	GO:0033046	1.98485e-14
negative regulation of chromosome separation	GO:1905819	3.81382e-14
negative regulation of chromosome segregation	GO:0051985	3.81382e-14
regulation of mitotic metaphase/anaphase transition	GO:0030071	5.63575e-14
negative regulation of cellular component organization	GO:0051129	6.05003e-14
regulation of mitotic sister chromatid segregation	GO:0033047	9.62513e-14
negative regulation of nuclear division	GO:0051784	9.83229e-14
regulation of metaphase/anaphase transition of cell cycle	GO:1902099	1.10564e-13
mitotic spindle assembly checkpoint signaling	GO:0007094	2.06195e-13
mitotic spindle checkpoint signaling	GO:0071174	2.06195e-13
spindle assembly checkpoint signaling	GO:0071173	2.06195e-13
DNA repair	GO:0006281	2.61589e-13
spindle checkpoint signaling	GO:0031577	2.88212e-13
small molecule metabolic process	GO:0044281	3.657e-13
negative regulation of mitotic metaphase/anaphase transition	GO:0045841	3.99494e-13
regulation of G2/M transition of mitotic cell cycle	GO:0010389	4.16146e-13
microtubule cytoskeleton organization involved in mitosis	GO:1902850	5.27195e-13
oxidative phosphorylation	GO:0006119	5.28114e-13
nucleoside phosphate metabolic process	GO:0006753	6.43318e-13
actin filament-based process	GO:0030029	7.45459e-13
negative regulation of metaphase/anaphase transition of cell cycle	GO:1902100	7.49702e-13
ribose phosphate biosynthetic process	GO:0046390	7.58544e-13
regulation of DNA-templated DNA replication	GO:0090329	9.57713e-13
cellular response to stress	GO:0033554	1.01871e-12
cellular response to DNA damage stimulus	GO:0006974	1.20226e-12
negative regulation of chromosome organization	GO:2001251	1.69364e-12
purine ribonucleotide biosynthetic process	GO:0009152	1.69855e-12
organophosphate biosynthetic process	GO:0090407	2.83196e-12
spindle organization	GO:0007051	4.06947e-12
regulation of chromosome organization	GO:0033044	4.20858e-12
positive regulation of cell cycle	GO:0045787	4.52124e-12
actin cytoskeleton organization	GO:0030036	4.95243e-12
ribonucleotide biosynthetic process	GO:0009260	5.77328e-12
nucleobase-containing small molecule metabolic process	GO:0055086	5.95223e-12
regulation of cell cycle G2/M phase transition	GO:1902749	6.26494e-12
microtubule cytoskeleton organization	GO:0000226	9.00859e-12
cellular macromolecule biosynthetic process	GO:0034645	1.00512e-11
nucleotide metabolic process	GO:0009117	1.13748e-11
purine-containing compound biosynthetic process	GO:0072522	1.45447e-11
purine nucleotide biosynthetic process	GO:0006164	1.89037e-11
negative regulation of cellular process	GO:0048523	2.53182e-11
energy derivation by oxidation of organic compounds	GO:0015980	3.2371e-11
mitotic spindle organization	GO:0007052	5.31641e-11
cell cycle DNA replication	GO:0044786	7.31578e-11
generation of precursor metabolites and energy	GO:0006091	9.78143e-11
ribose phosphate metabolic process	GO:0019693	1.01959e-10
ribonucleoside triphosphate biosynthetic process	GO:0009201	1.12471e-10
DNA replication initiation	GO:0006270	3.21576e-10
amide biosynthetic process	GO:0043604	4.23064e-10
purine ribonucleoside triphosphate biosynthetic process	GO:0009206	4.67765e-10
purine-containing compound metabolic process	GO:0072521	5.31789e-10
biosynthetic process	GO:0009058	7.21538e-10
purine ribonucleotide metabolic process	GO:0009150	7.43046e-10
purine nucleoside triphosphate biosynthetic process	GO:0009145	7.51005e-10
cellular amide metabolic process	GO:0043603	1.01667e-09
nucleoside triphosphate biosynthetic process	GO:0009142	1.02773e-09
regulation of molecular function	GO:0065009	1.17098e-09
anatomical structure development	GO:0048856	1.20066e-09
nucleoside phosphate biosynthetic process	GO:1901293	1.27074e-09
organic substance biosynthetic process	GO:1901576	1.52493e-09
ribonucleotide metabolic process	GO:0009259	1.62394e-09
purine nucleotide metabolic process	GO:0006163	2.13169e-09
cytokinesis	GO:0000910	2.61984e-09
mitotic cytokinesis	GO:0000281	2.87856e-09
DNA unwinding involved in DNA replication	GO:0006268	2.91411e-09
nucleotide biosynthetic process	GO:0009165	3.51441e-09
animal organ development	GO:0048513	3.59178e-09
negative regulation of organelle organization	GO:0010639	3.59528e-09
regulation of catalytic activity	GO:0050790	4.47932e-09
cellular biosynthetic process	GO:0044249	4.51038e-09
attachment of spindle microtubules to kinetochore	GO:0008608	5.02481e-09
translation	GO:0006412	7.19262e-09
nuclear DNA replication	GO:0033260	7.32934e-09
meiotic cell cycle process	GO:1903046	8.36759e-09
negative regulation of protein modification process	GO:0031400	9.32953e-09
regulation of protein localization	GO:0032880	1.02161e-08
positive regulation of chromosome segregation	GO:0051984	1.3283e-08
cell population proliferation	GO:0008283	1.4486e-08
nucleoside triphosphate metabolic process	GO:0009141	1.52393e-08
peptide metabolic process	GO:0006518	1.57354e-08
multicellular organism development	GO:0007275	2.01281e-08
regulation of cytoskeleton organization	GO:0051493	2.32544e-08
proton motive force-driven ATP synthesis	GO:0015986	2.34157e-08
anatomical structure morphogenesis	GO:0009653	2.5121e-08
regulation of plasma membrane bounded cell projection organization	GO:0120035	2.55486e-08
regulation of cell projection organization	GO:0031344	2.81051e-08
regulation of cellular localization	GO:0060341	2.86312e-08
peptide biosynthetic process	GO:0043043	2.96888e-08
protein metabolic process	GO:0019538	3.33394e-08
proton motive force-driven mitochondrial ATP synthesis	GO:0042776	3.73166e-08
ATP synthesis coupled electron transport	GO:0042773	4.45047e-08
mitochondrial ATP synthesis coupled electron transport	GO:0042775	4.45047e-08
double-strand break repair	GO:0006302	4.6531e-08
positive regulation of chromosome separation	GO:1905820	4.79207e-08
developmental process	GO:0032502	5.14799e-08
ATP biosynthetic process	GO:0006754	5.23283e-08
aerobic electron transport chain	GO:0019646	6.04242e-08
mitotic spindle midzone assembly	GO:0051256	6.18374e-08
regulation of cell communication	GO:0010646	7.17657e-08
mitotic spindle assembly	GO:0090307	7.68217e-08
regulation of signaling	GO:0023051	7.91406e-08
protein localization to cell periphery	GO:1990778	8.42044e-08
nervous system development	GO:0007399	8.83298e-08
regulation of DNA replication	GO:0006275	1.01068e-07
regulation of cytokinesis	GO:0032465	1.07512e-07
intracellular signal transduction	GO:0035556	1.31979e-07
mitotic spindle elongation	GO:0000022	1.46668e-07
cytoskeleton-dependent cytokinesis	GO:0061640	1.68782e-07
purine nucleoside triphosphate metabolic process	GO:0009144	1.7987e-07
regulation of transferase activity	GO:0051338	2.0372e-07
cell projection organization	GO:0030030	2.24729e-07
regulation of DNA metabolic process	GO:0051052	2.27355e-07
tissue development	GO:0009888	2.46157e-07
DNA integrity checkpoint signaling	GO:0031570	2.50975e-07
double-strand break repair via break-induced replication	GO:0000727	2.5156e-07
regulation of cellular component biogenesis	GO:0044087	2.69262e-07
meiotic nuclear division	GO:0140013	2.79876e-07
microtubule-based process	GO:0007017	2.80646e-07
centromere complex assembly	GO:0034508	2.8294e-07
cell morphogenesis	GO:0000902	2.90742e-07
ribonucleoside triphosphate metabolic process	GO:0009199	2.98347e-07
spindle elongation	GO:0051231	3.14051e-07
meiotic cell cycle	GO:0051321	3.44483e-07
spindle assembly	GO:0051225	3.53399e-07
negative regulation of G2/M transition of mitotic cell cycle	GO:0010972	4.08104e-07
regulation of anatomical structure morphogenesis	GO:0022603	4.16838e-07
system development	GO:0048731	4.23862e-07
small molecule catabolic process	GO:0044282	4.69793e-07
response to endogenous stimulus	GO:0009719	5.14082e-07
response to alcohol	GO:0097305	5.24622e-07
cell junction organization	GO:0034330	5.3497e-07
plasma membrane bounded cell projection organization	GO:0120036	5.5208e-07
positive regulation of mitotic cell cycle phase transition	GO:1901992	5.86959e-07
spindle midzone assembly	GO:0051255	6.20732e-07
negative regulation of cell cycle G2/M phase transition	GO:1902750	6.22802e-07
positive regulation of protein localization	GO:1903829	6.84396e-07
cell morphogenesis involved in differentiation	GO:0000904	7.29536e-07
purine ribonucleoside triphosphate metabolic process	GO:0009205	7.62201e-07
DNA geometric change	GO:0032392	7.67891e-07
non-membrane-bounded organelle assembly	GO:0140694	8.28787e-07
mitotic DNA replication	GO:1902969	8.60726e-07
DNA conformation change	GO:0071103	8.75672e-07
regulation of signal transduction	GO:0009966	9.47664e-07
proton transmembrane transport	GO:1902600	1.06758e-06
regulation of cell division	GO:0051302	1.08694e-06
negative regulation of cell projection organization	GO:0031345	1.24254e-06
positive regulation of cellular component organization	GO:0051130	1.3939e-06
epithelium development	GO:0060429	1.5425e-06
DNA duplex unwinding	GO:0032508	1.577e-06
ameboidal-type cell migration	GO:0001667	2.16725e-06
protein localization to plasma membrane	GO:0072659	2.27998e-06
actin filament organization	GO:0007015	2.56584e-06
regulation of developmental process	GO:0050793	2.75714e-06
negative regulation of phosphate metabolic process	GO:0045936	2.81815e-06
small molecule biosynthetic process	GO:0044283	2.9963e-06
DNA biosynthetic process	GO:0071897	3.12272e-06
cell migration	GO:0016477	3.34774e-06
negative regulation of phosphorus metabolic process	GO:0010563	3.37051e-06
regulation of localization	GO:0032879	4.38432e-06
ATP metabolic process	GO:0046034	4.68629e-06
response to hormone	GO:0009725	4.77533e-06
positive regulation of cell cycle phase transition	GO:1901989	5.0434e-06
regulation of DNA-templated DNA replication initiation	GO:0030174	5.07982e-06
negative regulation of transferase activity	GO:0051348	5.23824e-06
negative regulation of cellular metabolic process	GO:0031324	5.4539e-06
regulation of DNA-directed DNA polymerase activity	GO:1900262	6.48772e-06
positive regulation of DNA-directed DNA polymerase activity	GO:1900264	6.48772e-06
respiratory electron transport chain	GO:0022904	6.54514e-06
supramolecular fiber organization	GO:0097435	7.29214e-06
metaphase plate congression	GO:0051310	7.57828e-06
establishment or maintenance of cell polarity	GO:0007163	7.79076e-06
organic acid catabolic process	GO:0016054	8.06889e-06
chromosome condensation	GO:0030261	1.08823e-05
positive regulation of cellular process	GO:0048522	1.14102e-05
response to oxygen-containing compound	GO:1901700	1.28154e-05
protein localization to chromosome, centromeric region	GO:0071459	1.36031e-05
kinetochore organization	GO:0051383	1.37839e-05
gland development	GO:0048732	1.57489e-05
response to organonitrogen compound	GO:0010243	1.586e-05
small GTPase mediated signal transduction	GO:0007264	1.82671e-05
protein localization to chromosome	GO:0034502	1.96311e-05
positive regulation of mitotic cell cycle	GO:0045931	1.96761e-05
DNA strand elongation involved in DNA replication	GO:0006271	2.15876e-05
positive regulation of G2/M transition of mitotic cell cycle	GO:0010971	2.27067e-05
DNA strand elongation	GO:0022616	2.422e-05
positive regulation of cell cycle G2/M phase transition	GO:1902751	2.76766e-05
cell cycle G1/S phase transition	GO:0044843	2.80881e-05
regulation of supramolecular fiber organization	GO:1902903	2.86865e-05
chromosome localization	GO:0050000	2.89988e-05
regulation of actin filament-based process	GO:0032970	3.11302e-05
neuron projection development	GO:0031175	3.19238e-05
mitotic DNA integrity checkpoint signaling	GO:0044774	3.22757e-05
negative regulation of protein phosphorylation	GO:0001933	3.23514e-05
carboxylic acid catabolic process	GO:0046395	3.51357e-05
regulation of actin cytoskeleton organization	GO:0032956	4.20068e-05
regulation of cell population proliferation	GO:0042127	4.31005e-05
cellular response to stimulus	GO:0051716	4.34648e-05
neuron differentiation	GO:0030182	4.53199e-05
regulation of protein metabolic process	GO:0051246	5.56336e-05
cell-cell junction organization	GO:0045216	5.65256e-05
animal organ morphogenesis	GO:0009887	5.7215e-05
positive regulation of DNA metabolic process	GO:0051054	5.72933e-05
sister chromatid cohesion	GO:0007062	5.90794e-05
generation of neurons	GO:0048699	6.27804e-05
regulation of protein modification process	GO:0031399	6.43242e-05
establishment of chromosome localization	GO:0051303	6.72969e-05
establishment of organelle localization	GO:0051656	7.0303e-05
negative regulation of phosphorylation	GO:0042326	7.91435e-05
mitotic G2/M transition checkpoint	GO:0044818	8.62757e-05
neurogenesis	GO:0022008	9.1251e-05
DNA recombination	GO:0006310	9.40973e-05
morphogenesis of an epithelium	GO:0002009	9.81979e-05
recombinational repair	GO:0000725	9.95258e-05
cellular response to endogenous stimulus	GO:0071495	0.000104971
fatty acid catabolic process	GO:0009062	0.000105849
negative regulation of nitrogen compound metabolic process	GO:0051172	0.000109462
regulation of protein localization to cell periphery	GO:1904375	0.00011367
G1/S transition of mitotic cell cycle	GO:0000082	0.000124466
regulation of protein localization to nucleus	GO:1900180	0.000127314
regulation of establishment of protein localization	GO:0070201	0.000131477
DNA damage checkpoint signaling	GO:0000077	0.000133445
growth	GO:0040007	0.000137934
regulation of neuron projection development	GO:0010975	0.000146089
regulation of cell development	GO:0060284	0.000146399
regulation of epithelial cell migration	GO:0010632	0.000146458
positive regulation of mitotic sister chromatid separation	GO:1901970	0.000149575
regulation of endothelial cell migration	GO:0010594	0.000159908
regulation of cellular component size	GO:0032535	0.000166431
brain development	GO:0007420	0.000172389
epithelial cell migration	GO:0010631	0.000172478
regulation of cell migration	GO:0030334	0.000186395
signaling	GO:0023052	0.000186981
cell communication	GO:0007154	0.000187663
regulation of nervous system development	GO:0051960	0.000200128
regulation of neurogenesis	GO:0050767	0.000202628
mammary gland development	GO:0030879	0.000202855
oxoacid metabolic process	GO:0043436	0.000210255
cellular macromolecule localization	GO:0070727	0.00022025
regulation of protein phosphorylation	GO:0001932	0.000234421
tube development	GO:0035295	0.000238338
negative regulation of cell division	GO:0051782	0.000240264
kinetochore assembly	GO:0051382	0.000242411
cellular localization	GO:0051641	0.000257549
signal transduction	GO:0007165	0.000258682
mitotic metaphase plate congression	GO:0007080	0.000262196
epithelium migration	GO:0090132	0.000262435
central nervous system development	GO:0007417	0.000263095
regulation of intracellular signal transduction	GO:1902531	0.000263325
DNA replication checkpoint signaling	GO:0000076	0.000267867
cortical cytoskeleton organization	GO:0030865	0.000267981
embryo development	GO:0009790	0.000271623
regulation of phosphorylation	GO:0042325	0.000274285
regulation of actin filament organization	GO:0110053	0.00028075
epithelial tube morphogenesis	GO:0060562	0.000285457
meiosis I cell cycle process	GO:0061982	0.000290253
response to nitrogen compound	GO:1901698	0.000292194
cellular nitrogen compound biosynthetic process	GO:0044271	0.000296761
nucleoside monophosphate biosynthetic process	GO:0009124	0.000303524
head development	GO:0060322	0.000311959
organic acid metabolic process	GO:0006082	0.000339183
cellular lipid catabolic process	GO:0044242	0.000339288
regulation of phosphate metabolic process	GO:0019220	0.00034662
protein polymerization	GO:0051258	0.000347975
regulation of phosphorus metabolic process	GO:0051174	0.000358115
regulation of cellular process	GO:0050794	0.000360295
protein localization	GO:0008104	0.000367504
organophosphate catabolic process	GO:0046434	0.000372049
meiotic chromosome segregation	GO:0045132	0.000386028
cytokinetic process	GO:0032506	0.000415078
apoptotic process	GO:0006915	0.000424311
regulation of establishment of planar polarity	GO:0090175	0.000430398
attachment of mitotic spindle microtubules to kinetochore	GO:0051315	0.000446491
carboxylic acid metabolic process	GO:0019752	0.000447372
cell part morphogenesis	GO:0032990	0.000473346
enzyme-linked receptor protein signaling pathway	GO:0007167	0.000490608
regulation of cellular response to stress	GO:0080135	0.000509236
regulation of biological quality	GO:0065008	0.000517712
cell death	GO:0008219	0.000519647
electron transport chain	GO:0022900	0.000532374
mitotic G2 DNA damage checkpoint signaling	GO:0007095	0.000533531
double-strand break repair via homologous recombination	GO:0000724	0.000544904
response to organic cyclic compound	GO:0014070	0.000553944
tissue migration	GO:0090130	0.000591309
programmed cell death	GO:0012501	0.000599679
lipid metabolic process	GO:0006629	0.000628378
signal transduction in response to DNA damage	GO:0042770	0.000652125
cellular response to hormone stimulus	GO:0032870	0.000670509
regulation of response to DNA damage stimulus	GO:2001020	0.000700861
regulation of attachment of spindle microtubules to kinetochore	GO:0051988	0.000702459
placenta development	GO:0001890	0.000709593
phosphorylation	GO:0016310	0.000728261
monocarboxylic acid catabolic process	GO:0072329	0.000734601
mitotic DNA damage checkpoint signaling	GO:0044773	0.000739695
regulation of cell cycle checkpoint	GO:1901976	0.000752248
regulation of kinase activity	GO:0043549	0.000760075
endothelial cell migration	GO:0043542	0.000799977
regulation of cell morphogenesis	GO:0022604	0.000861435
cell projection morphogenesis	GO:0048858	0.000878628
regulation of transport	GO:0051049	0.000888877
reproductive process	GO:0022414	0.000894565
response to organic substance	GO:0010033	0.000898343
response to inorganic substance	GO:0010035	0.000915164
Wnt signaling pathway	GO:0016055	0.00100801
mitotic chromosome condensation	GO:0007076	0.00102789
protein-DNA complex assembly	GO:0065004	0.00104026
regulation of cell motility	GO:2000145	0.00106858
regulation of apoptotic signaling pathway	GO:2001233	0.00111638
negative regulation of neuron projection development	GO:0010977	0.00113138
cell-cell signaling by wnt	GO:0198738	0.00114182
catabolic process	GO:0009056	0.00115686
reproduction	GO:0000003	0.00115885
cell junction assembly	GO:0034329	0.00118895
regulation of intracellular transport	GO:0032386	0.00120388
organelle localization	GO:0051640	0.001228
negative regulation of nervous system development	GO:0051961	0.00123212
cell motility	GO:0048870	0.00124367
positive regulation of molecular function	GO:0044093	0.0012451
positive regulation of cytokinesis	GO:0032467	0.00125093
plasma membrane bounded cell projection morphogenesis	GO:0120039	0.00125647
neuron development	GO:0048666	0.00127021
developmental growth	GO:0048589	0.00127696
positive regulation of protein localization to nucleus	GO:1900182	0.00130073
tissue morphogenesis	GO:0048729	0.00131033
cellular aldehyde metabolic process	GO:0006081	0.00132867
Wnt signaling pathway, planar cell polarity pathway	GO:0060071	0.00136473
regulation of spindle checkpoint	GO:0090231	0.0013685
regulation of mitotic spindle checkpoint	GO:1903504	0.0013685
regulation of mitotic cell cycle spindle assembly checkpoint	GO:0090266	0.0013685
negative regulation of ubiquitin-protein transferase activity	GO:0051444	0.00144367
neuron projection morphogenesis	GO:0048812	0.00145185
regulation of DNA biosynthetic process	GO:2000278	0.00148727
cellular response to oxygen-containing compound	GO:1901701	0.0015371
cellular catabolic process	GO:0044248	0.00157287
female meiotic nuclear division	GO:0007143	0.00163877
cell development	GO:0048468	0.00165085
regulation of protein transport	GO:0051223	0.00168746
cell morphogenesis involved in neuron differentiation	GO:0048667	0.00169196
extraembryonic membrane development	GO:1903867	0.00170871
negative regulation of protein metabolic process	GO:0051248	0.00181049
chordate embryonic development	GO:0043009	0.00181735
meiosis I	GO:0007127	0.00190361
protein phosphorylation	GO:0006468	0.00195476
negative regulation of cell differentiation	GO:0045596	0.0019684
positive regulation of establishment of protein localization	GO:1904951	0.00201286
positive regulation of organelle organization	GO:0010638	0.00210011
protein localization to cell cortex	GO:0072697	0.00218514
cellular developmental process	GO:0048869	0.00222464
regulation of cell death	GO:0010941	0.00223041
regulation of cyclin-dependent protein serine/threonine kinase activity	GO:0000079	0.00233024
protein modification process	GO:0036211	0.00242276
positive regulation of DNA biosynthetic process	GO:2000573	0.00242512
response to estrogen	GO:0043627	0.00253633
positive regulation of biological process	GO:0048518	0.0026524
regulation of cell cycle G1/S phase transition	GO:1902806	0.00266435
regulation of intracellular protein transport	GO:0033157	0.00271689
negative regulation of neurogenesis	GO:0050768	0.0027196
positive regulation of catalytic activity	GO:0043085	0.00277474
negative regulation of cytoskeleton organization	GO:0051494	0.002794
embryonic placenta development	GO:0001892	0.00290515
cellular component morphogenesis	GO:0032989	0.00292355
protein localization to condensed chromosome	GO:1903083	0.00302977
protein localization to kinetochore	GO:0034501	0.00302977
cell surface receptor signaling pathway involved in cell-cell signaling	GO:1905114	0.0030346
regulation of cyclin-dependent protein kinase activity	GO:1904029	0.00314929
centrosome cycle	GO:0007098	0.00327784
positive regulation of transport	GO:0051050	0.00348863
organic substance catabolic process	GO:1901575	0.00349457
urogenital system development	GO:0001655	0.00355156
cell differentiation	GO:0030154	0.00357437
axon extension involved in axon guidance	GO:0048846	0.00360194
neuron projection extension involved in neuron projection guidance	GO:1902284	0.00360194
regulation of ubiquitin protein ligase activity	GO:1904666	0.00361047
regulation of growth	GO:0040008	0.00366208
negative regulation of biosynthetic process	GO:0009890	0.00380598
neural tube formation	GO:0001841	0.00383038
deoxyribonucleotide metabolic process	GO:0009262	0.00383922
macromolecule localization	GO:0033036	0.00384569
regulation of cell projection assembly	GO:0060491	0.00397659
protein localization to nucleus	GO:0034504	0.00407261
regulation of cell size	GO:0008361	0.00408504
negative regulation of response to stimulus	GO:0048585	0.00411373
actin polymerization or depolymerization	GO:0008154	0.00413162
circulatory system development	GO:0072359	0.00420234
negative regulation of cell communication	GO:0010648	0.00428809
transport across blood-brain barrier	GO:0150104	0.00435178
vascular transport	GO:0010232	0.00435178
negative regulation of signal transduction	GO:0009968	0.0044579
negative regulation of protein kinase activity	GO:0006469	0.00446256
embryo development ending in birth or egg hatching	GO:0009792	0.00457554
cell differentiation involved in embryonic placenta development	GO:0060706	0.00465585
regulation of protein kinase activity	GO:0045859	0.00494522
regulation of binding	GO:0051098	0.00497941
regulation of developmental growth	GO:0048638	0.00498921
regulation of programmed cell death	GO:0043067	0.00518867
negative regulation of cell population proliferation	GO:0008285	0.00530278
carbohydrate metabolic process	GO:0005975	0.0053923
regulation of intrinsic apoptotic signaling pathway	GO:2001242	0.00541928
tube morphogenesis	GO:0035239	0.00568296
regulation of axonogenesis	GO:0050770	0.00570842
deoxyribose phosphate metabolic process	GO:0019692	0.00574878
protein-DNA complex subunit organization	GO:0071824	0.00587376
negative regulation of signaling	GO:0023057	0.00587623
regulation of neuron differentiation	GO:0045664	0.00591918
localization	GO:0051179	0.00602957
response to insulin	GO:0032868	0.00604767
response to ethanol	GO:0045471	0.00653932
cellular lipid metabolic process	GO:0044255	0.00659437
regulation of animal organ morphogenesis	GO:2000027	0.00660181
regulation of G1/S transition of mitotic cell cycle	GO:2000045	0.00666222
monocarboxylic acid metabolic process	GO:0032787	0.00669549
negative regulation of protein-containing complex assembly	GO:0031333	0.00672121
positive regulation of protein transport	GO:0051222	0.00676312
response to stimulus	GO:0050896	0.00680567
DNA-templated DNA replication maintenance of fidelity	GO:0045005	0.0068093
regulation of apoptotic process	GO:0042981	0.00684651
response to wounding	GO:0009611	0.0068585
negative regulation of cellular biosynthetic process	GO:0031327	0.00701753
mitochondrion organization	GO:0007005	0.00718236
positive regulation of chromosome condensation	GO:1905821	0.00725061
negative regulation of developmental process	GO:0051093	0.00726909
regulation of biological process	GO:0050789	0.0078294
sulfur compound metabolic process	GO:0006790	0.00791457
regulation of protein localization to membrane	GO:1905475	0.00799701
negative regulation of cell death	GO:0060548	0.00804113
negative regulation of cell migration	GO:0030336	0.00811284
cellular component organization	GO:0016043	0.00849406
negative regulation of locomotion	GO:0040013	0.00860928
apoptotic signaling pathway	GO:0097190	0.00864116
actin filament bundle assembly	GO:0051017	0.00880079
macromolecule modification	GO:0043412	0.00902682
cell cycle DNA replication initiation	GO:1902292	0.00912058
mitotic DNA replication initiation	GO:1902975	0.00912058
nuclear cell cycle DNA replication initiation	GO:1902315	0.00912058
regulation of protein-containing complex assembly	GO:0043254	0.00960895
axon development	GO:0061564	0.00961406
negative regulation of protein binding	GO:0032091	0.00991199
regulation of locomotion	GO:0040012	0.0100458
positive regulation of mitotic cell cycle spindle assembly checkpoint	GO:0090267	0.0102838
positive regulation of spindle checkpoint	GO:0090232	0.0102838
positive regulation of cell population proliferation	GO:0008284	0.0107578
negative regulation of kinase activity	GO:0033673	0.0109095
microtubule polymerization or depolymerization	GO:0031109	0.0113312
regulation of small GTPase mediated signal transduction	GO:0051056	0.0114219
nucleoside monophosphate metabolic process	GO:0009123	0.0115068
regulation of plasma membrane bounded cell projection assembly	GO:0120032	0.0116975
regulation of protein polymerization	GO:0032271	0.0117371
negative regulation of ubiquitin protein ligase activity	GO:1904667	0.0120558
epithelial cell morphogenesis	GO:0003382	0.0121882
microtubule organizing center organization	GO:0031023	0.0122208
2'-deoxyribonucleotide metabolic process	GO:0009394	0.0123013
establishment of planar polarity	GO:0001736	0.0124147
establishment of tissue polarity	GO:0007164	0.0124147
response to abiotic stimulus	GO:0009628	0.0125267
fatty acid beta-oxidation	GO:0006635	0.0125933
cellular response to chemical stimulus	GO:0070887	0.012644
protein depolymerization	GO:0051261	0.0127802
negative regulation of axonogenesis	GO:0050771	0.0130019
actin filament bundle organization	GO:0061572	0.0130712
anatomical structure formation involved in morphogenesis	GO:0048646	0.0132847
DNA replication preinitiation complex assembly	GO:0071163	0.0137166
intrinsic apoptotic signaling pathway	GO:0097193	0.0138598
primary neural tube formation	GO:0014020	0.0141159
actomyosin structure organization	GO:0031032	0.0142671
negative regulation of apoptotic process	GO:0043066	0.0144467
transmembrane receptor protein tyrosine kinase signaling pathway	GO:0007169	0.0145056
positive regulation of attachment of spindle microtubules to kinetochore	GO:0051987	0.0145066
negative regulation of biological process	GO:0048519	0.0149215
morphogenesis of a polarized epithelium	GO:0001738	0.0149752
positive regulation of intracellular transport	GO:0032388	0.0149786
ruffle organization	GO:0031529	0.0153156
epithelial cell differentiation	GO:0030855	0.0158907
protein localization to chromatin	GO:0071168	0.0163247
lipid catabolic process	GO:0016042	0.0163368
meiotic spindle organization	GO:0000212	0.0163509
regulation of cell shape	GO:0008360	0.0178743
negative regulation of programmed cell death	GO:0043069	0.0180225
biological regulation	GO:0065007	0.0185678
cellular component disassembly	GO:0022411	0.0187086
regulation of microtubule cytoskeleton organization	GO:0070507	0.0187311
mammary gland epithelium development	GO:0061180	0.0187491
negative regulation of macromolecule biosynthetic process	GO:0010558	0.0187803
regulation of axon extension involved in axon guidance	GO:0048841	0.0188227
non-canonical Wnt signaling pathway	GO:0035567	0.019656
response to ionizing radiation	GO:0010212	0.0197226
ruffle assembly	GO:0097178	0.0197281
mitochondrial electron transport, cytochrome c to oxygen	GO:0006123	0.0202305
organelle assembly	GO:0070925	0.0205695
base-excision repair	GO:0006284	0.0207768
cellular response to insulin stimulus	GO:0032869	0.0213422
cellular component organization or biogenesis	GO:0071840	0.0216124
regulation of extent of cell growth	GO:0061387	0.0216947
multicellular organismal process	GO:0032501	0.0219067
positive regulation of protein phosphorylation	GO:0001934	0.0222952
positive regulation of mitotic cytokinesis	GO:1903490	0.0224843
regulation of GTPase activity	GO:0043087	0.0229544
regulation of DNA repair	GO:0006282	0.0229767
microtubule depolymerization	GO:0007019	0.0231453
negative regulation of cell motility	GO:2000146	0.0236126
ossification	GO:0001503	0.0247297
cochlea development	GO:0090102	0.0248961
positive regulation of cytoskeleton organization	GO:0051495	0.0251602
positive regulation of endothelial cell migration	GO:0010595	0.0254269
tricarboxylic acid cycle	GO:0006099	0.0257611
regulation of protein binding	GO:0043393	0.0265803
cell growth	GO:0016049	0.0268235
regulation of anatomical structure size	GO:0090066	0.0268766
negative regulation of supramolecular fiber organization	GO:1902904	0.0270374
mitotic DNA replication checkpoint signaling	GO:0033314	0.0296676
regulation of attachment of mitotic spindle microtubules to kinetochore	GO:1902423	0.0299667
positive regulation of attachment of mitotic spindle microtubules to kinetochore	GO:1902425	0.0299667
response to radiation	GO:0009314	0.030503
cellular response to organic cyclic compound	GO:0071407	0.0308902
regulation of multicellular organismal process	GO:0051239	0.0317001
mesenchymal cell differentiation	GO:0048762	0.0317518
response to oxidative stress	GO:0006979	0.0319936
positive regulation of DNA-templated DNA replication	GO:2000105	0.0329627
replication fork processing	GO:0031297	0.033016
carboxylic acid biosynthetic process	GO:0046394	0.0333091
nucleoside phosphate catabolic process	GO:1901292	0.0341042
regulation of cell differentiation	GO:0045595	0.0346885
negative regulation of growth	GO:0045926	0.03504
spindle localization	GO:0051653	0.0355435
embryonic epithelial tube formation	GO:0001838	0.0355698
morphogenesis of embryonic epithelium	GO:0016331	0.0356255
negative regulation of cell development	GO:0010721	0.0357753
GMP biosynthetic process	GO:0006177	0.0369307
positive regulation of nuclease activity	GO:0032075	0.0380888
kidney development	GO:0001822	0.0384954
regulation of metaphase plate congression	GO:0090235	0.0385937
organic acid biosynthetic process	GO:0016053	0.0405264
cell-cell junction assembly	GO:0007043	0.0408703
regulation of actin polymerization or depolymerization	GO:0008064	0.0414277
pyrimidine-containing compound biosynthetic process	GO:0072528	0.0421947
negative regulation of protein ubiquitination	GO:0031397	0.0422854
meiotic cell cycle phase transition	GO:0044771	0.0424257
macromolecule biosynthetic process	GO:0009059	0.0430551
response to steroid hormone	GO:0048545	0.0432483
locomotion	GO:0040011	0.0438256
positive regulation of intracellular protein transport	GO:0090316	0.0438425
purine nucleoside monophosphate biosynthetic process	GO:0009127	0.044328
female meiosis chromosome segregation	GO:0016321	0.0457726
phospholipid metabolic process	GO:0006644	0.045852
establishment of cell polarity	GO:0030010	0.0461223
lipid biosynthetic process	GO:0008610	0.0477137
response to peptide	GO:1901652	0.0478216
cell projection assembly	GO:0030031	0.0479651
regulation of mitotic cytokinesis	GO:1902412	0.0481212
female pregnancy	GO:0007565	0.0481872
positive regulation of cell development	GO:0010720	0.0484323
response to xenobiotic stimulus	GO:0009410	0.0485807
cellular response to organonitrogen compound	GO:0071417	0.0488967
mitochondrial electron transport, ubiquinol to cytochrome c	GO:0006122	0.0489971
cell-substrate adhesion	GO:0031589	0.0494776

## Sheet: Up in Non-CSC vs. No stimul.
term_name	term_id	adjusted_p_value
defense response	GO:0006952	1.81874e-23
response to other organism	GO:0051707	3.00252e-23
response to external biotic stimulus	GO:0043207	3.33432e-23
response to biotic stimulus	GO:0009607	1.23163e-22
biological process involved in interspecies interaction between organisms	GO:0044419	7.34395e-22
immune response	GO:0006955	1.6433e-21
defense response to other organism	GO:0098542	6.20899e-21
response to virus	GO:0009615	1.52684e-20
innate immune response	GO:0045087	2.94969e-20
defense response to virus	GO:0051607	1.5066e-18
defense response to symbiont	GO:0140546	1.65725e-18
response to external stimulus	GO:0009605	9.63023e-17
immune system process	GO:0002376	5.24638e-16
response to cytokine	GO:0034097	1.20028e-15
response to stress	GO:0006950	1.50944e-15
cellular response to cytokine stimulus	GO:0071345	3.9e-12
regulation of immune response	GO:0050776	6.38683e-12
cytokine-mediated signaling pathway	GO:0019221	6.66461e-11
positive regulation of response to stimulus	GO:0048584	1.19238e-10
regulation of immune system process	GO:0002682	1.49969e-10
regulation of cytokine production	GO:0001817	7.1686e-09
response to stimulus	GO:0050896	7.84887e-09
cytokine production	GO:0001816	8.70361e-09
positive regulation of signal transduction	GO:0009967	1.2562e-08
response to organic substance	GO:0010033	1.31035e-08
regulation of response to external stimulus	GO:0032101	1.84075e-08
inflammatory response	GO:0006954	2.39951e-08
pattern recognition receptor signaling pathway	GO:0002221	3.53547e-08
regulation of defense response	GO:0031347	4.05866e-08
regulation of response to stimulus	GO:0048583	7.94861e-08
positive regulation of cell communication	GO:0010647	8.27451e-08
positive regulation of signaling	GO:0023056	9.36152e-08
regulation of response to cytokine stimulus	GO:0060759	9.9333e-08
positive regulation of immune system process	GO:0002684	1.77811e-07
cellular response to chemical stimulus	GO:0070887	2.28878e-07
positive regulation of response to external stimulus	GO:0032103	2.54363e-07
response to interferon-gamma	GO:0034341	3.13358e-07
cytoplasmic pattern recognition receptor signaling pathway	GO:0002753	4.28896e-07
positive regulation of response to cytokine stimulus	GO:0060760	8.03443e-07
intracellular signal transduction	GO:0035556	9.22901e-07
regulation of response to stress	GO:0080134	9.34854e-07
response to bacterium	GO:0009617	1.90769e-06
cellular response to organic substance	GO:0071310	2.24943e-06
cellular response to stimulus	GO:0051716	2.98063e-06
cell surface receptor signaling pathway	GO:0007166	3.24787e-06
toll-like receptor signaling pathway	GO:0002224	4.40781e-06
cellular response to virus	GO:0098586	4.58588e-06
regulation of intracellular signal transduction	GO:1902531	4.69475e-06
I-kappaB kinase/NF-kappaB signaling	GO:0007249	5.38805e-06
regulation of signal transduction	GO:0009966	6.12405e-06
cellular response to interferon-gamma	GO:0071346	7.83052e-06
positive regulation of cytokine production	GO:0001819	1.02641e-05
positive regulation of inflammatory response	GO:0050729	1.10213e-05
positive regulation of immune response	GO:0050778	1.48144e-05
response to chemical	GO:0042221	1.51634e-05
regulation of response to biotic stimulus	GO:0002831	2.02299e-05
NIK/NF-kappaB signaling	GO:0038061	2.42233e-05
humoral immune response	GO:0006959	2.71524e-05
response to molecule of bacterial origin	GO:0002237	3.38716e-05
positive regulation of defense response	GO:0031349	3.53626e-05
immune response-regulating signaling pathway	GO:0002764	4.05436e-05
cell adhesion	GO:0007155	4.30006e-05
immune effector process	GO:0002252	5.03331e-05
regulation of cytokine-mediated signaling pathway	GO:0001959	5.31737e-05
regulation of multicellular organismal process	GO:0051239	5.31785e-05
regulation of cell communication	GO:0010646	5.66238e-05
myeloid leukocyte activation	GO:0002274	6.33097e-05
regulation of signaling	GO:0023051	6.46852e-05
positive regulation of multicellular organismal process	GO:0051240	6.80234e-05
positive regulation of gene expression	GO:0010628	7.39717e-05
regulation of viral life cycle	GO:1903900	8.19967e-05
positive regulation of intracellular signal transduction	GO:1902533	8.67603e-05
adaptive immune response based on somatic recombination of immune receptors built from immunoglobulin superfamily domains	GO:0002460	9.63187e-05
signal transduction	GO:0007165	0.000105268
regulation of inflammatory response	GO:0050727	0.000129146
leukocyte activation	GO:0045321	0.000137842
cell activation	GO:0001775	0.000140743
leukocyte mediated immunity	GO:0002443	0.000193414
regulation of immune effector process	GO:0002697	0.000195176
positive regulation of tumor necrosis factor production	GO:0032760	0.000236082
nucleotide-binding oligomerization domain containing signaling pathway	GO:0070423	0.00024404
regulation of type 2 immune response	GO:0002828	0.00025467
cell communication	GO:0007154	0.000261474
signaling	GO:0023052	0.000309014
regulation of multicellular organismal development	GO:2000026	0.000312979
nucleotide-binding domain, leucine rich repeat containing receptor signaling pathway	GO:0035872	0.000329364
positive regulation of tumor necrosis factor superfamily cytokine production	GO:1903557	0.000330837
response to lipopolysaccharide	GO:0032496	0.000382516
regulation of pattern recognition receptor signaling pathway	GO:0062207	0.00038781
T cell mediated immunity	GO:0002456	0.000389543
interferon-beta production	GO:0032608	0.000390187
regulation of interferon-beta production	GO:0032648	0.000390187
regulation of cell adhesion	GO:0030155	0.000408793
regulation of viral process	GO:0050792	0.0004168
adaptive immune response	GO:0002250	0.000447739
regulation of toll-like receptor signaling pathway	GO:0034121	0.000462681
leukocyte differentiation	GO:0002521	0.000508003
type 2 immune response	GO:0042092	0.000531306
cellular response to interleukin-1	GO:0071347	0.000598993
viral life cycle	GO:0019058	0.000662824
positive regulation of biological process	GO:0048518	0.000694722
regulation of leukocyte mediated immunity	GO:0002703	0.000742666
T cell activation involved in immune response	GO:0002286	0.000780367
lymphocyte mediated immunity	GO:0002449	0.000925107
cellular response to tumor necrosis factor	GO:0071356	0.00105141
neuroinflammatory response	GO:0150076	0.00128085
regulation of tumor necrosis factor production	GO:0032680	0.00143745
tumor necrosis factor production	GO:0032640	0.00143745
cellular response to molecule of bacterial origin	GO:0071219	0.0014737
regulation of innate immune response	GO:0045088	0.00147499
positive regulation of interleukin-6 production	GO:0032755	0.00162493
regulation of I-kappaB kinase/NF-kappaB signaling	GO:0043122	0.00167712
response to interleukin-1	GO:0070555	0.00172681
response to tumor necrosis factor	GO:0034612	0.00187806
regulation of tumor necrosis factor superfamily cytokine production	GO:1903555	0.00190079
tumor necrosis factor superfamily cytokine production	GO:0071706	0.00190079
positive regulation of immune effector process	GO:0002699	0.00205989
myeloid leukocyte differentiation	GO:0002573	0.00206462
negative regulation of viral genome replication	GO:0045071	0.00209374
positive regulation of cytokine-mediated signaling pathway	GO:0001961	0.00216263
T-helper 2 cell cytokine production	GO:0035745	0.00224474
regulation of T-helper 2 cell cytokine production	GO:2000551	0.00224474
positive regulation of NF-kappaB transcription factor activity	GO:0051092	0.00238511
positive regulation of I-kappaB kinase/NF-kappaB signaling	GO:0043123	0.00261791
regulation of apoptotic signaling pathway	GO:2001233	0.00279749
microglial cell activation	GO:0001774	0.00310085
cytoplasmic pattern recognition receptor signaling pathway in response to virus	GO:0039528	0.00361091
positive regulation of DNA-binding transcription factor activity	GO:0051091	0.00362217
response to amyloid-beta	GO:1904645	0.0037361
regulation of phosphate metabolic process	GO:0019220	0.00378768
regulation of phosphorus metabolic process	GO:0051174	0.00384753
cell death	GO:0008219	0.00385624
cellular response to biotic stimulus	GO:0071216	0.0038744
leukocyte activation involved in inflammatory response	GO:0002269	0.00401098
cell activation involved in immune response	GO:0002263	0.00414971
negative regulation of cytokine production	GO:0001818	0.00481311
regulation of interleukin-6 production	GO:0032675	0.00499574
interleukin-6 production	GO:0032635	0.00499574
response to dsRNA	GO:0043331	0.00499663
glial cell activation	GO:0061900	0.00510583
vertebrate eye-specific patterning	GO:0150064	0.00515642
regulation of viral genome replication	GO:0045069	0.00535614
viral process	GO:0016032	0.00588301
apoptotic signaling pathway	GO:0097190	0.00622206
regulation of adaptive immune response	GO:0002819	0.00673689
apoptotic process	GO:0006915	0.00726578
detection of diacyl bacterial lipopeptide	GO:0042496	0.00748565
toll-like receptor TLR6:TLR2 signaling pathway	GO:0038124	0.00748565
CD4-positive, alpha-beta T cell cytokine production	GO:0035743	0.00755852
regulation of cell death	GO:0010941	0.00840253
regulation of DNA-binding transcription factor activity	GO:0051090	0.00876498
toll-like receptor 2 signaling pathway	GO:0034134	0.00901311
regulation of molecular function	GO:0065009	0.00931712
nucleotide-binding oligomerization domain containing 2 signaling pathway	GO:0070431	0.00983115
complement-mediated synapse pruning	GO:0150062	0.0103076
mononuclear cell differentiation	GO:1903131	0.0105409
cellular response to lipopolysaccharide	GO:0071222	0.0112924
positive regulation of interferon-beta production	GO:0032728	0.0113431
macrophage differentiation	GO:0030225	0.0116559
negative regulation of viral process	GO:0048525	0.0121448
cell adhesion mediated by integrin	GO:0033627	0.0127217
positive regulation of molecular function	GO:0044093	0.0130561
programmed cell death	GO:0012501	0.0131531
positive regulation of leukocyte migration	GO:0002687	0.0133753
MAPK cascade	GO:0000165	0.0140186
negative regulation of response to stimulus	GO:0048585	0.015191
interferon-gamma-mediated signaling pathway	GO:0060333	0.0157507
positive regulation of cell migration	GO:0030335	0.0161482
response to exogenous dsRNA	GO:0043330	0.0168432
cell migration	GO:0016477	0.0168443
lipid localization	GO:0010876	0.0183593
positive regulation of myeloid leukocyte mediated immunity	GO:0002888	0.0184874
positive regulation of phosphorus metabolic process	GO:0010562	0.0185997
positive regulation of phosphate metabolic process	GO:0045937	0.0185997
negative regulation of innate immune response	GO:0045824	0.0186795
cell-cell adhesion	GO:0098609	0.018852
leukocyte activation involved in immune response	GO:0002366	0.0189247
regulation of protein phosphorylation	GO:0001932	0.0189959
regulation of MHC class I biosynthetic process	GO:0045343	0.0194817
MHC class I biosynthetic process	GO:0045341	0.0194817
negative regulation of signal transduction	GO:0009968	0.021136
regulation of type I interferon production	GO:0032479	0.0213259
type I interferon production	GO:0032606	0.0213259
positive regulation of protein metabolic process	GO:0051247	0.0214123
positive regulation of cytokine production involved in immune response	GO:0002720	0.0221335
regulation of phosphorylation	GO:0042325	0.0222215
detection of bacterial lipopeptide	GO:0070340	0.0224321
anatomical structure formation involved in morphogenesis	GO:0048646	0.0224568
positive regulation of pattern recognition receptor signaling pathway	GO:0062208	0.0226023
regulation of apoptotic process	GO:0042981	0.0227359
positive regulation of protein phosphorylation	GO:0001934	0.0241465
hemopoiesis	GO:0030097	0.0256111
cell motility	GO:0048870	0.0262929
RIG-I signaling pathway	GO:0039529	0.0265757
MyD88-dependent toll-like receptor signaling pathway	GO:0002755	0.0278224
regulation of developmental process	GO:0050793	0.0280866
positive regulation of leukocyte mediated immunity	GO:0002705	0.028506
cell population proliferation	GO:0008283	0.0285128
extracellular matrix disassembly	GO:0022617	0.0304213
regulation of cysteine-type endopeptidase activity involved in apoptotic signaling pathway	GO:2001267	0.0311774
interleukin-27-mediated signaling pathway	GO:0070106	0.0314342
glutamate homeostasis	GO:0090461	0.0314853
immune system development	GO:0002520	0.0317071
positive regulation of cell death	GO:0010942	0.0319619
leukocyte homeostasis	GO:0001776	0.0319715
regulation of programmed cell death	GO:0043067	0.0324663
positive regulation of tyrosine phosphorylation of STAT protein	GO:0042531	0.0326863
cytokine production involved in immune response	GO:0002367	0.0346017
regulation of cytokine production involved in immune response	GO:0002718	0.0346017
ERK1 and ERK2 cascade	GO:0070371	0.0362604
regulation of adaptive immune response based on somatic recombination of immune receptors built from immunoglobulin superfamily domains	GO:0002822	0.0383664
positive regulation of cell motility	GO:2000147	0.0395783
regulation of cell population proliferation	GO:0042127	0.0404153
regulation of NIK/NF-kappaB signaling	GO:1901222	0.0410594
leukocyte cell-cell adhesion	GO:0007159	0.0410947
negative regulation of cell communication	GO:0010648	0.0437965
cellular response to diacyl bacterial lipopeptide	GO:0071726	0.0448146
response to diacyl bacterial lipopeptide	GO:0071724	0.0448146
negative regulation of signaling	GO:0023057	0.0481441
hematopoietic or lymphoid organ development	GO:0048534	0.0490262

## Sheet: Down in Non-CSC vs. No stimul. 
term_name	term_id	adjusted_p_value
mitotic cell cycle	GO:0000278	1.32507e-40
mitotic cell cycle process	GO:1903047	1.4136e-39
cell cycle process	GO:0022402	2.10847e-37
cell cycle	GO:0007049	1.50676e-36
regulation of cell cycle process	GO:0010564	1.3823e-31
cell division	GO:0051301	6.036e-30
mitotic nuclear division	GO:0140014	8.51592e-28
regulation of cell cycle	GO:0051726	1.42224e-27
nuclear division	GO:0000280	3.38115e-27
chromosome organization	GO:0051276	1.43499e-25
sister chromatid segregation	GO:0000819	1.85354e-25
cell cycle phase transition	GO:0044770	2.44441e-25
mitotic sister chromatid segregation	GO:0000070	2.57121e-25
organelle fission	GO:0048285	5.21067e-25
chromosome segregation	GO:0007059	5.64244e-25
mitotic cell cycle phase transition	GO:0044772	3.15424e-24
cytoplasmic translation	GO:0002181	1.89684e-23
nuclear chromosome segregation	GO:0098813	1.01024e-22
regulation of mitotic cell cycle	GO:0007346	3.11741e-22
regulation of cell cycle phase transition	GO:1901987	1.89624e-21
DNA-templated DNA replication	GO:0006261	1.53217e-20
regulation of mitotic cell cycle phase transition	GO:1901990	2.58042e-20
DNA replication	GO:0006260	3.04352e-20
regulation of chromosome segregation	GO:0051983	1.21387e-19
negative regulation of cell cycle process	GO:0010948	3.77115e-18
regulation of chromosome separation	GO:1905818	7.63404e-18
negative regulation of cell cycle	GO:0045786	1.516e-17
cell cycle checkpoint signaling	GO:0000075	3.57388e-17
chromosome separation	GO:0051304	5.34386e-17
negative regulation of cell cycle phase transition	GO:1901988	6.98116e-17
positive regulation of cell cycle process	GO:0090068	7.04571e-17
regulation of mitotic sister chromatid separation	GO:0010965	8.13399e-16
regulation of mitotic nuclear division	GO:0007088	1.54599e-15
mitotic sister chromatid separation	GO:0051306	1.61304e-15
mitotic cell cycle checkpoint signaling	GO:0007093	1.66574e-15
regulation of DNA-templated DNA replication	GO:0090329	3.70321e-15
regulation of sister chromatid segregation	GO:0033045	5.90831e-15
negative regulation of mitotic cell cycle phase transition	GO:1901991	6.99745e-15
G2/M transition of mitotic cell cycle	GO:0000086	9.21275e-15
metaphase/anaphase transition of mitotic cell cycle	GO:0007091	1.05105e-14
cell cycle G2/M phase transition	GO:0044839	1.31823e-14
metaphase/anaphase transition of cell cycle	GO:0044784	2.03758e-14
regulation of nuclear division	GO:0051783	2.26413e-14
organelle organization	GO:0006996	5.65105e-14
negative regulation of mitotic cell cycle	GO:0045930	6.44132e-14
negative regulation of sister chromatid segregation	GO:0033046	1.16308e-13
negative regulation of mitotic sister chromatid segregation	GO:0033048	1.16308e-13
negative regulation of mitotic sister chromatid separation	GO:2000816	1.16308e-13
regulation of mitotic metaphase/anaphase transition	GO:0030071	1.32717e-13
organonitrogen compound biosynthetic process	GO:1901566	1.81749e-13
negative regulation of mitotic nuclear division	GO:0045839	2.43549e-13
negative regulation of chromosome segregation	GO:0051985	2.45499e-13
negative regulation of chromosome separation	GO:1905819	2.45499e-13
regulation of metaphase/anaphase transition of cell cycle	GO:1902099	2.51323e-13
microtubule cytoskeleton organization involved in mitosis	GO:1902850	4.34422e-13
positive regulation of cell cycle	GO:0045787	6.62282e-13
mitotic spindle checkpoint signaling	GO:0071174	6.66617e-13
mitotic spindle assembly checkpoint signaling	GO:0007094	6.66617e-13
spindle assembly checkpoint signaling	GO:0071173	6.66617e-13
regulation of mitotic sister chromatid segregation	GO:0033047	7.05905e-13
regulation of chromosome organization	GO:0033044	7.27373e-13
spindle checkpoint signaling	GO:0031577	9.82299e-13
negative regulation of mitotic metaphase/anaphase transition	GO:0045841	1.43285e-12
cell cycle DNA replication	GO:0044786	2.46459e-12
cellular macromolecule metabolic process	GO:0044260	2.92155e-12
negative regulation of metaphase/anaphase transition of cell cycle	GO:1902100	2.9631e-12
negative regulation of nuclear division	GO:0051784	3.24701e-12
spindle organization	GO:0007051	4.72279e-12
negative regulation of chromosome organization	GO:2001251	7.24629e-12
regulation of G2/M transition of mitotic cell cycle	GO:0010389	7.96729e-12
DNA metabolic process	GO:0006259	1.52331e-11
DNA replication initiation	GO:0006270	2.97383e-11
mitotic spindle organization	GO:0007052	3.24407e-11
DNA repair	GO:0006281	3.59478e-11
aerobic respiration	GO:0009060	5.66209e-11
regulation of cellular component organization	GO:0051128	5.91024e-11
cytoskeleton organization	GO:0007010	6.64097e-11
microtubule cytoskeleton organization	GO:0000226	7.19196e-11
regulation of cell cycle G2/M phase transition	GO:1902749	8.26043e-11
negative regulation of cellular component organization	GO:0051129	9.30798e-11
cellular response to DNA damage stimulus	GO:0006974	2.91768e-10
regulation of organelle organization	GO:0033043	3.30154e-10
phosphate-containing compound metabolic process	GO:0006796	8.50353e-10
nuclear DNA replication	GO:0033260	9.2842e-10
phosphorus metabolic process	GO:0006793	1.38745e-09
mitotic spindle assembly	GO:0090307	2.60116e-09
attachment of spindle microtubules to kinetochore	GO:0008608	3.4581e-09
cytokinesis	GO:0000910	5.5712e-09
regulation of cytokinesis	GO:0032465	6.10282e-09
mitotic spindle midzone assembly	GO:0051256	6.44628e-09
amide biosynthetic process	GO:0043604	7.47202e-09
regulation of DNA replication	GO:0006275	8.30663e-09
cellular respiration	GO:0045333	8.37241e-09
spindle assembly	GO:0051225	1.0054e-08
DNA unwinding involved in DNA replication	GO:0006268	1.10906e-08
positive regulation of chromosome separation	GO:1905820	1.27039e-08
organophosphate metabolic process	GO:0019637	1.35906e-08
non-membrane-bounded organelle assembly	GO:0140694	1.47047e-08
mitotic cytokinesis	GO:0000281	1.53765e-08
meiotic cell cycle process	GO:1903046	1.71542e-08
translation	GO:0006412	1.74769e-08
mitotic spindle elongation	GO:0000022	1.90153e-08
nucleoside triphosphate biosynthetic process	GO:0009142	1.97603e-08
ribonucleoside triphosphate biosynthetic process	GO:0009201	2.02136e-08
negative regulation of organelle organization	GO:0010639	2.88813e-08
oxidative phosphorylation	GO:0006119	3.49449e-08
spindle elongation	GO:0051231	4.8613e-08
peptide biosynthetic process	GO:0043043	5.23353e-08
ribose phosphate biosynthetic process	GO:0046390	6.52101e-08
positive regulation of chromosome segregation	GO:0051984	6.62242e-08
double-strand break repair via break-induced replication	GO:0000727	9.57281e-08
nucleoside phosphate metabolic process	GO:0006753	1.09703e-07
spindle midzone assembly	GO:0051255	1.11533e-07
cellular amide metabolic process	GO:0043603	1.19817e-07
purine ribonucleoside triphosphate biosynthetic process	GO:0009206	1.26608e-07
meiotic nuclear division	GO:0140013	1.27119e-07
meiotic cell cycle	GO:0051321	1.64788e-07
purine nucleoside triphosphate biosynthetic process	GO:0009145	1.81625e-07
microtubule-based process	GO:0007017	1.81923e-07
peptide metabolic process	GO:0006518	2.01427e-07
cytoskeleton-dependent cytokinesis	GO:0061640	2.43926e-07
regulation of cell division	GO:0051302	2.61495e-07
metaphase plate congression	GO:0051310	2.82809e-07
nucleoside triphosphate metabolic process	GO:0009141	3.64764e-07
DNA integrity checkpoint signaling	GO:0031570	3.7288e-07
nucleotide metabolic process	GO:0009117	3.90593e-07
mitotic DNA replication	GO:1902969	4.39609e-07
small molecule metabolic process	GO:0044281	4.9299e-07
positive regulation of mitotic cell cycle phase transition	GO:1901992	4.94896e-07
purine ribonucleotide biosynthetic process	GO:0009152	5.40677e-07
nucleobase-containing small molecule metabolic process	GO:0055086	5.80442e-07
ribonucleotide biosynthetic process	GO:0009260	6.14577e-07
chromosome localization	GO:0050000	6.84295e-07
regulation of DNA-templated DNA replication initiation	GO:0030174	8.21693e-07
organonitrogen compound metabolic process	GO:1901564	8.32338e-07
carbohydrate derivative metabolic process	GO:1901135	8.58747e-07
cellular response to stress	GO:0033554	9.25022e-07
centromere complex assembly	GO:0034508	1.03785e-06
ribose phosphate metabolic process	GO:0019693	1.26584e-06
negative regulation of protein modification process	GO:0031400	1.78388e-06
positive regulation of cell cycle phase transition	GO:1901989	2.26099e-06
establishment of chromosome localization	GO:0051303	2.35048e-06
proton motive force-driven ATP synthesis	GO:0015986	2.43061e-06
purine-containing compound biosynthetic process	GO:0072522	2.45471e-06
proton motive force-driven mitochondrial ATP synthesis	GO:0042776	2.66826e-06
protein localization to chromosome, centromeric region	GO:0071459	2.79709e-06
generation of precursor metabolites and energy	GO:0006091	2.87724e-06
negative regulation of G2/M transition of mitotic cell cycle	GO:0010972	3.14092e-06
energy derivation by oxidation of organic compounds	GO:0015980	3.15856e-06
positive regulation of mitotic sister chromatid separation	GO:1901970	3.64368e-06
purine nucleoside triphosphate metabolic process	GO:0009144	4.03838e-06
cell population proliferation	GO:0008283	4.13304e-06
negative regulation of cell cycle G2/M phase transition	GO:1902750	4.47831e-06
DNA geometric change	GO:0032392	4.53122e-06
purine nucleotide biosynthetic process	GO:0006164	5.46637e-06
purine ribonucleotide metabolic process	GO:0009150	5.58504e-06
ribonucleoside triphosphate metabolic process	GO:0009199	6.06009e-06
DNA strand elongation involved in DNA replication	GO:0006271	6.4899e-06
ATP biosynthetic process	GO:0006754	6.81696e-06
chromosome condensation	GO:0030261	7.24274e-06
positive regulation of mitotic cell cycle	GO:0045931	7.49919e-06
protein localization to chromosome	GO:0034502	7.52768e-06
centrosome cycle	GO:0007098	8.85869e-06
regulation of DNA-directed DNA polymerase activity	GO:1900262	9.56571e-06
positive regulation of DNA-directed DNA polymerase activity	GO:1900264	9.56571e-06
organophosphate biosynthetic process	GO:0090407	9.79998e-06
cellular macromolecule biosynthetic process	GO:0034645	1.05877e-05
ribonucleotide metabolic process	GO:0009259	1.06354e-05
microtubule organizing center organization	GO:0031023	1.09005e-05
nucleoside phosphate biosynthetic process	GO:1901293	1.12679e-05
purine-containing compound metabolic process	GO:0072521	1.23635e-05
DNA conformation change	GO:0071103	1.34907e-05
DNA duplex unwinding	GO:0032508	1.73223e-05
purine nucleotide metabolic process	GO:0006163	1.87007e-05
purine ribonucleoside triphosphate metabolic process	GO:0009205	2.10226e-05
carbohydrate derivative biosynthetic process	GO:1901137	2.2346e-05
positive regulation of G2/M transition of mitotic cell cycle	GO:0010971	2.26436e-05
regulation of cytoskeleton organization	GO:0051493	2.57926e-05
nucleotide biosynthetic process	GO:0009165	3.19013e-05
mitotic metaphase plate congression	GO:0007080	3.20724e-05
DNA replication checkpoint signaling	GO:0000076	4.757e-05
small molecule catabolic process	GO:0044282	5.12765e-05
regulation of cell cycle checkpoint	GO:1901976	5.69294e-05
mitochondrial ATP synthesis coupled electron transport	GO:0042775	5.69372e-05
ATP synthesis coupled electron transport	GO:0042773	5.69372e-05
cytokinetic process	GO:0032506	5.74257e-05
meiosis I cell cycle process	GO:0061982	5.97772e-05
mitotic G2/M transition checkpoint	GO:0044818	5.99285e-05
ATP metabolic process	GO:0046034	6.8494e-05
cellular response to stimulus	GO:0051716	7.55384e-05
kinetochore organization	GO:0051383	8.34806e-05
regulation of transferase activity	GO:0051338	9.16988e-05
regulation of attachment of spindle microtubules to kinetochore	GO:0051988	9.93732e-05
intracellular signal transduction	GO:0035556	0.000101928
positive regulation of cell cycle G2/M phase transition	GO:1902751	0.00010275
DNA biosynthetic process	GO:0071897	0.000107525
organic acid catabolic process	GO:0016054	0.000144669
mitotic G2 DNA damage checkpoint signaling	GO:0007095	0.00015252
attachment of mitotic spindle microtubules to kinetochore	GO:0051315	0.00016853
protein-DNA complex assembly	GO:0065004	0.000194903
negative regulation of cell projection organization	GO:0031345	0.000197121
regulation of mitotic spindle checkpoint	GO:1903504	0.00022172
regulation of spindle checkpoint	GO:0090231	0.00022172
regulation of mitotic cell cycle spindle assembly checkpoint	GO:0090266	0.00022172
DNA damage checkpoint signaling	GO:0000077	0.000244192
signal transduction in response to DNA damage	GO:0042770	0.00026648
cell cycle G1/S phase transition	GO:0044843	0.000300733
sister chromatid cohesion	GO:0007062	0.000335405
mitotic DNA integrity checkpoint signaling	GO:0044774	0.000346514
positive regulation of cytokinesis	GO:0032467	0.000371748
negative regulation of cell division	GO:0051782	0.000425911
aerobic electron transport chain	GO:0019646	0.00046923
animal organ development	GO:0048513	0.000494346
carboxylic acid catabolic process	GO:0046395	0.000502373
negative regulation of cellular process	GO:0048523	0.000515185
double-strand break repair	GO:0006302	0.000521086
regulation of ubiquitin protein ligase activity	GO:1904666	0.000567275
base-excision repair	GO:0006284	0.000573602
DNA recombination	GO:0006310	0.000636944
regulation of cellular process	GO:0050794	0.000754607
regulation of cyclin-dependent protein serine/threonine kinase activity	GO:0000079	0.00075798
anatomical structure development	GO:0048856	0.000761196
respiratory electron transport chain	GO:0022904	0.000788256
protein phosphorylation	GO:0006468	0.000869756
regulation of protein phosphorylation	GO:0001932	0.000882107
mitotic chromosome condensation	GO:0007076	0.000928783
regulation of cyclin-dependent protein kinase activity	GO:1904029	0.00103051
phosphorylation	GO:0016310	0.00106326
protein-DNA complex subunit organization	GO:0071824	0.00108233
cell cycle DNA replication initiation	GO:1902292	0.00114279
nuclear cell cycle DNA replication initiation	GO:1902315	0.00114279
mitotic DNA replication initiation	GO:1902975	0.00114279
negative regulation of ubiquitin-protein transferase activity	GO:0051444	0.0011629
DNA strand elongation	GO:0022616	0.00123573
cellular component organization	GO:0016043	0.00124344
response to alcohol	GO:0097305	0.00144859
double-strand break repair via homologous recombination	GO:0000724	0.00147203
ameboidal-type cell migration	GO:0001667	0.00148657
regulation of signaling	GO:0023051	0.00150176
regulation of protein modification process	GO:0031399	0.0015159
regulation of cell communication	GO:0010646	0.0015276
negative regulation of phosphate metabolic process	GO:0045936	0.00166979
regulation of plasma membrane bounded cell projection organization	GO:0120035	0.00176329
kinetochore assembly	GO:0051382	0.00185455
negative regulation of phosphorus metabolic process	GO:0010563	0.00187377
negative regulation of protein ubiquitination	GO:0031397	0.00193157
recombinational repair	GO:0000725	0.00207951
embryo development	GO:0009790	0.0021078
actin filament-based process	GO:0030029	0.00237998
multicellular organism development	GO:0007275	0.00241928
proton transmembrane transport	GO:1902600	0.00259253
positive regulation of attachment of spindle microtubules to kinetochore	GO:0051987	0.00273849
negative regulation of protein modification by small protein conjugation or removal	GO:1903321	0.00284253
protein localization to cell periphery	GO:1990778	0.00292366
actin cytoskeleton organization	GO:0030036	0.00293023
cellular component organization or biogenesis	GO:0071840	0.00319254
positive regulation of DNA-templated DNA replication	GO:2000105	0.00327118
regulation of protein localization to cell periphery	GO:1904375	0.00352481
negative regulation of ubiquitin protein ligase activity	GO:1904667	0.0036987
positive regulation of mitotic cell cycle spindle assembly checkpoint	GO:0090267	0.00429761
positive regulation of spindle checkpoint	GO:0090232	0.00429761
regulation of catalytic activity	GO:0050790	0.00479506
regulation of endothelial cell migration	GO:0010594	0.00483049
regulation of cell projection organization	GO:0031344	0.00494693
cell death	GO:0008219	0.00499781
oxoacid metabolic process	GO:0043436	0.00573143
meiosis I	GO:0007127	0.00605484
negative regulation of transferase activity	GO:0051348	0.00610874
positive regulation of chromosome condensation	GO:1905821	0.006193
regulation of phosphorylation	GO:0042325	0.00638276
positive regulation of mitotic cytokinesis	GO:1903490	0.00682766
regulation of metaphase plate congression	GO:0090235	0.00687355
female meiotic nuclear division	GO:0007143	0.00689233
regulation of cell population proliferation	GO:0042127	0.00690111
developmental process	GO:0032502	0.00723157
reproductive process	GO:0022414	0.00728469
mitotic DNA damage checkpoint signaling	GO:0044773	0.00746703
organelle assembly	GO:0070925	0.00758678
reproduction	GO:0000003	0.00803031
regulation of spindle organization	GO:0090224	0.00805832
regulation of molecular function	GO:0065009	0.00807564
organic acid metabolic process	GO:0006082	0.00845371
protein localization to kinetochore	GO:0034501	0.00855505
protein localization to condensed chromosome	GO:1903083	0.00855505
branched-chain amino acid metabolic process	GO:0009081	0.0087971
tissue development	GO:0009888	0.00887572
positive regulation of ubiquitin protein ligase activity	GO:1904668	0.00889416
G1/S transition of mitotic cell cycle	GO:0000082	0.00911506
negative regulation of protein phosphorylation	GO:0001933	0.00964075
protein localization to chromatin	GO:0071168	0.00975397
regulation of phosphate metabolic process	GO:0019220	0.0101877
embryonic placenta development	GO:0001892	0.0103507
regulation of phosphorus metabolic process	GO:0051174	0.0104106
placenta development	GO:0001890	0.0107462
regulation of mitotic spindle organization	GO:0060236	0.0108027
positive regulation of attachment of mitotic spindle microtubules to kinetochore	GO:1902425	0.0108893
regulation of attachment of mitotic spindle microtubules to kinetochore	GO:1902423	0.0108893
meiotic chromosome segregation	GO:0045132	0.0113393
anatomical structure morphogenesis	GO:0009653	0.0113587
branched-chain amino acid catabolic process	GO:0009083	0.0118628
regulation of DNA metabolic process	GO:0051052	0.0121486
negative regulation of cell communication	GO:0010648	0.0146343
carboxylic acid metabolic process	GO:0019752	0.0146969
negative regulation of signal transduction	GO:0009968	0.0148203
protein localization to cell cortex	GO:0072697	0.0155551
DNA-templated DNA replication maintenance of fidelity	GO:0045005	0.0160659
mitotic DNA replication checkpoint signaling	GO:0033314	0.0168499
DNA replication preinitiation complex assembly	GO:0071163	0.0169838
positive regulation of cellular process	GO:0048522	0.0186862
endothelial cell migration	GO:0043542	0.0187451
regulation of cell cycle G1/S phase transition	GO:1902806	0.0192983
mammary gland development	GO:0030879	0.0193179
regulation of signal transduction	GO:0009966	0.019609
negative regulation of signaling	GO:0023057	0.0197134
response to stimulus	GO:0050896	0.0200119
cell differentiation involved in embryonic placenta development	GO:0060706	0.0206762
cell communication	GO:0007154	0.0209473
epithelium development	GO:0060429	0.0210558
regulation of ubiquitin-protein transferase activity	GO:0051438	0.0214618
regulation of neurogenesis	GO:0050767	0.0218218
positive regulation of developmental process	GO:0051094	0.0219985
electron transport chain	GO:0022900	0.0222043
regulation of mitotic cytokinesis	GO:1902412	0.0231853
mesenchymal cell differentiation	GO:0048762	0.0234107
meiotic chromosome condensation	GO:0010032	0.023579
cellular amino acid catabolic process	GO:0009063	0.0239547
embryo development ending in birth or egg hatching	GO:0009792	0.0256899
positive regulation of nuclease activity	GO:0032075	0.0261935
negative regulation of phosphorylation	GO:0042326	0.0266092
regulation of nervous system development	GO:0051960	0.0268908
regulation of cell development	GO:0060284	0.0278024
negative regulation of neuron projection development	GO:0010977	0.0304811
hexose metabolic process	GO:0019318	0.0306909
meiotic spindle organization	GO:0000212	0.0306985
chordate embryonic development	GO:0043009	0.0307458
meiotic cell cycle phase transition	GO:0044771	0.0310938
spindle localization	GO:0051653	0.0324407
organelle localization	GO:0051640	0.0337349
system development	GO:0048731	0.0346956
protein localization to plasma membrane	GO:0072659	0.0364729
nucleoside diphosphate metabolic process	GO:0009132	0.0365489
microtubule polymerization or depolymerization	GO:0031109	0.0385991
regulation of biological process	GO:0050789	0.0410125
regulation of protein kinase activity	GO:0045859	0.0422459
positive regulation of cell cycle checkpoint	GO:1901978	0.0422698
meiotic chromosome separation	GO:0051307	0.0449184
signal transduction	GO:0007165	0.04592
biosynthetic process	GO:0009058	0.0461756
small GTPase mediated signal transduction	GO:0007264	0.046746
signaling	GO:0023052	0.0480798

## Sheet: Down in CSC vs. Non-CSC
term_name	term_id	adjusted_p_value
cell adhesion	GO:0007155	5.28593e-15
tissue development	GO:0009888	1.42844e-09
anatomical structure morphogenesis	GO:0009653	2.13428e-09
system development	GO:0048731	5.68658e-09
multicellular organism development	GO:0007275	6.66881e-09
cell-cell adhesion	GO:0098609	2.68198e-08
anatomical structure development	GO:0048856	1.20147e-07
developmental process	GO:0032502	1.87728e-07
cell-cell adhesion via plasma-membrane adhesion molecules	GO:0098742	3.75256e-07
regulation of cell adhesion	GO:0030155	4.1883e-07
epithelium development	GO:0060429	4.25936e-07
cell migration	GO:0016477	9.00753e-07
positive regulation of cell migration	GO:0030335	6.06675e-06
cell morphogenesis	GO:0000902	6.11794e-06
cell motility	GO:0048870	6.97259e-06
cell morphogenesis involved in differentiation	GO:0000904	8.94462e-06
animal organ development	GO:0048513	9.23174e-06
locomotion	GO:0040011	1.28339e-05
homophilic cell adhesion via plasma membrane adhesion molecules	GO:0007156	1.2837e-05
cell-substrate adhesion	GO:0031589	1.55137e-05
morphogenesis of an epithelium	GO:0002009	1.57979e-05
positive regulation of cell motility	GO:2000147	1.70255e-05
cell-matrix adhesion	GO:0007160	1.75521e-05
positive regulation of locomotion	GO:0040017	3.04217e-05
tissue morphogenesis	GO:0048729	3.66386e-05
response to decreased oxygen levels	GO:0036293	4.54025e-05
nervous system development	GO:0007399	9.37969e-05
regulation of cellular component organization	GO:0051128	0.000124412
response to hypoxia	GO:0001666	0.00013715
animal organ morphogenesis	GO:0009887	0.000156477
response to oxygen levels	GO:0070482	0.000183047
tube development	GO:0035295	0.000198754
multicellular organismal process	GO:0032501	0.00021131
positive regulation of cell adhesion	GO:0045785	0.000344305
regulation of transforming growth factor beta production	GO:0071634	0.000355306
regulation of cell migration	GO:0030334	0.000388544
epithelial cell proliferation	GO:0050673	0.000445978
negative regulation of response to stimulus	GO:0048585	0.000502144
response to abiotic stimulus	GO:0009628	0.000532073
regulation of cell motility	GO:2000145	0.000537099
skin development	GO:0043588	0.000539236
transforming growth factor beta production	GO:0071604	0.000569452
anatomical structure formation involved in morphogenesis	GO:0048646	0.000577305
regulation of epithelial cell proliferation	GO:0050678	0.000596778
circulatory system development	GO:0072359	0.000604404
response to steroid hormone	GO:0048545	0.000647907
stem cell differentiation	GO:0048863	0.000863054
regulation of cell projection organization	GO:0031344	0.0010876
cell junction organization	GO:0034330	0.00111587
regulation of multicellular organismal process	GO:0051239	0.00144007
regulation of locomotion	GO:0040012	0.00146416
response to wounding	GO:0009611	0.00159988
actin filament-based process	GO:0030029	0.00164955
negative regulation of signal transduction	GO:0009968	0.00172254
negative regulation of cell communication	GO:0010648	0.00182881
wound healing	GO:0042060	0.00188341
cell development	GO:0048468	0.00191149
negative regulation of signaling	GO:0023057	0.00200363
cellular response to transforming growth factor beta stimulus	GO:0071560	0.00214905
regulation of plasma membrane bounded cell projection organization	GO:0120035	0.00257504
response to transforming growth factor beta	GO:0071559	0.0026526
tube morphogenesis	GO:0035239	0.00287312
neural crest cell migration	GO:0001755	0.00293211
regulation of cell communication	GO:0010646	0.00318581
stem cell development	GO:0048864	0.00346567
mesenchymal cell migration	GO:0090497	0.00369043
negative regulation of developmental process	GO:0051093	0.0041946
mesenchyme development	GO:0060485	0.00457967
axon guidance	GO:0007411	0.00492278
cell-substrate junction organization	GO:0150115	0.00503359
skeletal system development	GO:0001501	0.00509804
neuron projection guidance	GO:0097485	0.00516959
regulation of cell population proliferation	GO:0042127	0.00574629
regulation of signaling	GO:0023051	0.00587635
regulation of signal transduction	GO:0009966	0.00605314
actin cytoskeleton organization	GO:0030036	0.00667381
regulation of developmental process	GO:0050793	0.00672187
response to metal ion	GO:0010038	0.00712099
regulation of axonogenesis	GO:0050770	0.00753212
muscle contraction	GO:0006936	0.00821172
cell morphogenesis involved in neuron differentiation	GO:0048667	0.00875772
entry into host	GO:0044409	0.00944612
regulation of response to stress	GO:0080134	0.0102809
neuron development	GO:0048666	0.0103589
regulation of anatomical structure morphogenesis	GO:0022603	0.0105924
mesenchymal cell differentiation	GO:0048762	0.0107645
cardiac muscle cell-cardiac muscle cell adhesion	GO:0086042	0.0118241
regulation of cell-substrate adhesion	GO:0010810	0.0121579
hair follicle morphogenesis	GO:0031069	0.0123868
ameboidal-type cell migration	GO:0001667	0.0124587
neuron projection development	GO:0031175	0.0141102
cell differentiation	GO:0030154	0.0149286
cell-substrate junction assembly	GO:0007044	0.0159865
enzyme-linked receptor protein signaling pathway	GO:0007167	0.0169974
regulation of wound healing	GO:0061041	0.0176454
epidermis morphogenesis	GO:0048730	0.0179821
cellular developmental process	GO:0048869	0.0186995
cell-cell signaling	GO:0007267	0.0193819
axonogenesis	GO:0007409	0.0200669
regulation of neuron projection development	GO:0010975	0.0212254
regulation of cell-matrix adhesion	GO:0001952	0.0223638
gland development	GO:0048732	0.0236589
hair follicle development	GO:0001942	0.0280634
transforming growth factor beta receptor signaling pathway	GO:0007179	0.028316
neural crest cell development	GO:0014032	0.0294844
chemotaxis	GO:0006935	0.0301779
digestive tract development	GO:0048565	0.0306712
cell population proliferation	GO:0008283	0.0309366
taxis	GO:0042330	0.0317121
positive regulation of epithelial cell proliferation	GO:0050679	0.0323968
hair cycle process	GO:0022405	0.032652
molting cycle process	GO:0022404	0.032652
cell surface receptor signaling pathway	GO:0007166	0.0337081
skin epidermis development	GO:0098773	0.0343048
positive regulation of neuron maturation	GO:0014042	0.0344302
regulation of cell size	GO:0008361	0.0344305
neuron projection morphogenesis	GO:0048812	0.0352977
response to stimulus	GO:0050896	0.0356859
cell adhesion mediated by integrin	GO:0033627	0.0366334
integrin-mediated signaling pathway	GO:0007229	0.0378295
viral entry into host cell	GO:0046718	0.0397889
response to stress	GO:0006950	0.0400588
epithelial tube morphogenesis	GO:0060562	0.0406614
movement in host	GO:0044000	0.0429677
digestive system development	GO:0055123	0.043281
positive regulation of cell adhesion mediated by integrin	GO:0033630	0.0433909
supramolecular fiber organization	GO:0097435	0.0454014
regulation of response to stimulus	GO:0048583	0.046914
plasma membrane bounded cell projection morphogenesis	GO:0120039	0.0469872
heart development	GO:0007507	0.0476467
eye development	GO:0001654	0.0478709
response to inorganic substance	GO:0010035	0.049765
